1  
2  
3  
4  
5  
6  
7  
8  
9  
10  
11  
12  
13  
14  
15  
16  
17

# Title page

## Title:

A 12 kb multi-allelic copy number variation encompassing a GC gene enhancer is associated with mastitis resistance in dairy cattle

## Authors:

Young-Lim Lee<sup>1\*</sup>, Haruko Takeda<sup>2</sup>, Gabriel Costa Monteiro Moreira<sup>2</sup>, Latifa Karim<sup>3</sup>, Erik Mullaart<sup>4</sup>, Wouter Coppieters<sup>2,3</sup>, The GplusE consortium<sup>5</sup>, Ruth Appeltant<sup>2</sup>, Roel F. Veerkamp<sup>1</sup>, Martien A. M. Groenen<sup>1</sup>, Michel Georges<sup>2</sup>, Mirte Bosse<sup>1</sup>, Tom Druet<sup>2</sup>, Aniek C. Bouwman<sup>1</sup>, Carole Charlier<sup>2</sup>

## Affiliations:

<sup>1</sup> Wageningen University & Research, Animal Breeding and Genomics, Wageningen, the Netherlands

<sup>2</sup> Unit of Animal Genomics, GIGA-R & Faculty of Veterinary Medicine, University of Liège, Liège, Belgium

<sup>3</sup> GIGA Genomics Platform, GIGA Institute, University of Liège, Liège, Belgium

<sup>4</sup> CRV B.V., Arnhem, the Netherlands

<sup>5</sup> <http://www.gpluse.eu/>

\* [younglim.lee@wur.nl](mailto:younglim.lee@wur.nl)

## 18 **Abstract**

19 Clinical mastitis (CM) is an inflammatory disease occurring in the mammary glands of lactating cows. CM is under genetic control,  
20 and a prominent CM resistance QTL located on chromosome 6 was reported in various dairy cattle breeds. Nevertheless, the  
21 biological mechanism underpinning this QTL has been lacking. Herein, we mapped, fine-mapped, and discovered the putative causal  
22 variant underlying this CM resistance QTL in the Dutch dairy cattle population. We identified a ~12 kb multi-allelic copy number  
23 variant (CNV), that is in perfect linkage disequilibrium with a GWAS lead SNP, as a promising candidate variant. By implementing a  
24 genome-wide association study (GWAS) and through expression QTL mapping, we showed that the group-specific component gene  
25 (*GC*), a gene encoding a vitamin D binding protein, is an excellent candidate causal gene for the QTL. The multiplied alleles are  
26 associated with increased *GC* expression and low CM resistance. Ample evidence from functional genomics data supports the  
27 presence of an enhancer within this CNV, which would exert *cis*-regulatory effect on *GC*. We observed that strong positive selection  
28 swept the region near the CNV, and haplotypes associated with the multiplied allele were strongly selected for. Moreover, the  
29 multiplied allele showed pleiotropic effects for increased milk yield and reduced fertility, hinting that a shared underlying biology  
30 for these effects may revolve around the vitamin D pathway. These findings together suggest a putative causal variant of a CM  
31 resistance QTL, where a *cis*-regulatory element located within a CNV can alter gene expression and affect multiple economically  
32 important traits.

33

34

## 35 **Author summary**

36 Clinical mastitis (CM) is an inflammatory disease that negatively influences dairy production and compromises animal welfare.  
37 Although one major genetic locus for CM resistance was mapped on bovine chromosome 6, a mechanistic description of this  
38 association has been lacking. Herein, we report a 12-kb multiallelic copy number variant (CNV), encompassing a strong  
39 enhancer for group-specific component gene (*GC*), as a likely causal variant for this locus. This CNV is associated with high *GC*  
40 expression and low CM resistance. We speculate that upregulation of *GC* leads to a large amount of vitamin D binding protein,  
41 which in turn, reduces biologically available vitamin D, resulting in vitamin D deficiency and low CM resistance. Despite the  
42 negative effect on CM resistance, the CNV contributes to increased milk production, hinting at balancing selection. Our results  
43 highlight how multiplication of a regulatory element can shape economically important traits in dairy cattle, both in  
44 favourable and unfavourable directions.

45

## 46 Introduction

47 Clinical mastitis (CM) is an inflammation in the mammary glands. This condition is often seen in dairy cattle and the  
48 repercussions of CM include production loss, use of antibiotics, and compromised animal welfare [1]. CM resistance has a  
49 genetic component, with estimated heritabilities ranging between 0.01 and 0.10 [2–6]. Genome-wide associations studies  
50 (GWASs) identified several quantitative trait loci (QTL) associated with CM resistance or somatic cell score (SCS), an indicator  
51 trait of CM. For instance, the six most significant CM resistance QTLs together capture 8.9% of the genetic variance in Danish  
52 Holstein Friesian (HF) cattle, underlining the polygenic nature of CM resistance [7]. Of these six QTLs, the most significant QTL  
53 mapped near 88 Mb on the *Bos taurus* autosome (BTA) 6 was repeatedly reported in various dairy cattle populations [8–12].  
54 Several fine-mapping studies, using imputed whole genome sequence (WGS) variants, reported non-coding candidate causal  
55 SNPs at the group-specific component (*GC*) gene [7,12–15]. One of these studies investigated, albeit unsuccessfully, whether  
56 one of the non-coding candidate SNP obtained from the GWAS was associated with *GC* expression, leaving the functional  
57 mechanisms underlying this association elusive [13]. Interestingly, the proposed candidate SNPs showed antagonistic allele  
58 effects for milk yield (MY) (the high CM resistance allele was linked to low MY, and vice versa [7,13,16]), and one study  
59 concluded that a single pleiotropic variant regulates both of the traits [17]. Furthermore, this locus harbours QTL for many  
60 traits including body conformation, fertility, and longevity [12,15,18–22], implying pleiotropy, which remains to be  
61 investigated. Until now, *GC*, a gene that encodes the vitamin D binding protein (DBP), has been considered the most promising  
62 candidate gene for the CM resistance QTL on BTA 6 [13,14]. A growing body of literature underpins the importance of DBP,  
63 which acts as a macrophage activating factor, modulates immune responses [23], and is central to the vitamin D pathway  
64 [24]. For instance, polymorphisms in *GC* have been shown to cause vitamin D deficiency and inflammatory diseases in humans  
65 [25]. Moreover, a therapeutic use of vitamin D in lactating, CM-infected cows reduced inflammation, implying a link between  
66 vitamin D and inflammation [26,27]. Yet, the GWAS lead SNP was not associated with *GC* expression or alternative  
67 transcription, leaving the functional mechanism elusive [13]. Some researchers hypothesized that a copy number variant  
68 (CNV) might be the causal variant underlying this QTL [7]. Indeed, a CNV in high linkage disequilibrium (LD) with the GWAS  
69 lead SNP was found in the 3' alternative exon of *GC*, however, the functional role of this CNV was not well characterized [13].  
70 In this study, we aimed at confirming the presence of the prominent CM resistance QTL in the Dutch HF population, and  
71 identifying a candidate causal gene and a variant that may explain the functional mechanism(s) of the QTL. Our findings  
72 strongly suggest that (1) the CM resistance QTL on BTA 6 is present in the Dutch HF population; (2) a 12-kb multi-allelic CNV,  
73 encompassing the 3' alternative exon of *GC*, harbours a putative enhancer, which exerts *cis*-regulation on the candidate  
74 causal gene, *GC*; (3) a haplotype associated with the CNV allele is strongly selected for, and the CNV has pleiotropic effects  
75 on MY, body conformation and fertility traits. These findings together highlight a functional CNV that contains a *cis*-regulatory  
76 element, affecting gene expression and subsequently altering the economically important traits.

## 77 Results

### 78 A major CM resistance QTL on BTA 6 segregates in the Dutch HF cattle population

79 A CM resistance QTL has been identified on BTA6 in several cattle populations [7–10,12–14]. We first aimed at confirming  
80 presence of this QTL in the Dutch HF population. All analyses were performed according to the Bovine genome assembly  
81 UMD3.1 [28], unless noted otherwise. To map the QTL, we performed a GWAS using 4,142 progeny tested bulls. These  
82 animals were genotyped using a custom 16K array, and imputed sequentially, firstly to the Illumina Bovine 50K array, and  
83 then to higher density (770K). CM resistance was recorded as a binary trait, depending on the disease status registration  
84 done by farmers [29]. The estimated breeding values of CM resistance were de-regressed and used as phenotypes in a single  
85 SNP GWAS performed using an additive model, and accounting for genetic relationships. The strong association signal near  
86 BTA 6:88.6 Mb found in Danish HF and Norwegian Red populations was replicated in the Dutch HF population ( $-\log_{10}P=7.35$ ;  
87 Fig 1A, S1 Fig). This association signal was found downstream of *GC*, a reverse-oriented gene located at BTA 6:88.68–88.74  
88 Mb. We fine-mapped this QTL, using 45,782 imputed WGS level variants present in a 10-Mb window encompassing the QTL  
89 (BTA 6:84–93 Mb), aiming at (1) confirming the *GC* as a positional candidate gene and (2) identifying a candidate causal variant.  
90 This 10-Mb window contained the previously reported CNV, which was in high LD with the GWAS lead SNP [13]. Thus, we  
91 kept SNPs located within the CNV in the WGS imputation panel, as they could possibly tag the CNV. The association signal  
92 peaked in a 200-Kb region (BTA 6:88.5–88.7 Mb), spanning over *GC* and the region downstream of *GC*. The lead SNP,  
93 rs110813063, located at BTA 6:88,683,517 ( $-\log_{10}P=9.59$ ) was ~4 kb downstream of *GC* (Fig 1B). The T allele of the lead SNP  
94 (allele frequency (AF) = 0.58), was associated with low CM resistance, whereas the C allele was associated with high CM  
95 resistance (AF=0.42). Finally, a conditional analysis was performed by including the lead SNP as a covariate in the GWAS  
96 model. SNPs in the association peak were no longer significant, with the exception of a minor signal at the left side of the  
97 association peak (Fig 1C). Our results confirmed the presence of the CM resistance QTL in the Dutch HF population, however,  
98 as with previous studies [7,13–15], the non-coding lead SNP (rs110813063) did not have any evidence of functional role.  
99 There were no coding variants amongst the variant in high LD with the lead SNP ( $r^2>0.9$ ). Provided that the strong association  
100 signals do not necessarily indicate causality, due to confounding factors including LD and limited sample sizes [30], we further  
101 characterized the lead SNP using WGS data.

102

### 103 A multi-allelic CNV is in high LD with the GWAS lead SNP for CM resistance QTL on BTA 6

104 By manually inspecting the WGS data, we observed that the GWAS lead SNP (rs110813063) was located within a ~12 kb CNV  
105 encompassing the 14<sup>th</sup> exon of *GC* (Fig 2A). This CNV, present in both dairy and beef cattle populations [31], was reported to  
106 be in high LD with the candidate SNP for CM resistance QTL in a Norwegian Red population [13]. Thus, we hypothesized that

107 the CNV might be the causal variant underlying this QTL. To confirm this hypothesis, we characterized the CNV using WGS  
108 data of 266 HF animals. Our CNV calling pipeline, exploiting split-read, pair-end mapping, and read depth evidence, confirmed  
109 the presence of the ~12 kb CNV at BTA 6:88,681,767-88,693,553 (hereafter referred to as GC CNV; S2 Fig). The 14<sup>th</sup> exon of  
110 GC, encompassed by the CNV, is a 3' alternative exon, only accounting for minority of the total GC expression [13]. Sequenced  
111 individuals presented either normal read depth (no CNV) or a highly inflated coverage, 2.5 to 5 times higher than expected  
112 (CNV carriers; Fig 2B), implying multiple copies. To characterize whether different copy numbers (CN) were present at the GC  
113 CNV locus, sequencing read depth information was used to obtain CN per individual (diploid CN). The distribution of this  
114 diploid CN in the sequenced population suggested segregation of four different alleles corresponding to haploid CNs 1, 4, 5,  
115 or 6 copies (Fig 2C). Based on these alleles and observed individual CN, we determined corresponding CN genotypes (e.g.,  
116 individuals with CN 2 and 6 would be respectively carriers of alleles CN1/CN1 and CN1/CN5). The genotypes remained  
117 ambiguous only for individuals with 10 copies, that could be either CN4/CN6 or CN5/CN5. In all sequenced duos or trios, these  
118 inferred genotypes were compatible with Mendelian segregation rules (Fig 2D), and no genotype incompatibility was  
119 observed. Genotypes from relatives of individuals with 10 copies allowed us also to deduce that all carriers of 10 copies were  
120 CN4/CN6. Overall, these results suggest that the four alleles (CNs 1, 4, 5, and 6) are truly segregating in the population, rather  
121 than the result of noise associated with depth estimation. Carriers of alleles CN5 or CN6 were restricted to a limited number  
122 of families. In these families, the segregation of these two alleles perfectly matched haplotype transmission from parents to  
123 offspring (S3 Fig), further supporting the presence of multiple alleles. An analysis of homozygosity-by-descent (HBD) in all  
124 sequenced individuals revealed that alleles CN 4, 5 and 6 share a common haplotype, identical-by-descent for at least 200 kb  
125 ( $\geq 600$  SNPs; S1 Table). The HBD segments were rare at the CNV position in CN 1 individuals, presenting more haplotypic  
126 diversity. Only two out of 88 heterozygous individuals were IBD in the studied position for an extremely short segment (12  
127 kb, 93 SNPs), indicating that the CN 1 allele was associated with different haplotypes. In summary, we identified four alleles  
128 at the GC CNV locus: CN 1 corresponds to a single copy and considered wildtype (Wt) given the high haplotypic diversity,  
129 whereas alleles CNs 4-6 correspond to multiple copies (Mul), with four to six copies (Fig 3A). In our population, CN 1 and CN  
130 4 were the most frequent alleles (0.39 and 0.54, respectively), while CN 5 and CN 6 were rare (0.03 and 0.05, respectively;  
131 Fig 3A). Furthermore, the GC CNV, coded as a biallelic variant where CN 1 (Wt) was the reference allele and CNs 4-6 (Mul)  
132 were grouped together as the alternative allele, was in perfect linkage ( $r^2=1$ ) with the GWAS lead SNP (rs110813063). The T  
133 allele, associated with low CM resistance, tagged CNs 4-6, whereas the C allele tagged CN 1. Thus, this SNP was used as a  
134 surrogate marker for GC CNV in subsequent analyses. The GC CNV contained five tagging SNPs, including the GWAS lead SNP  
135 ( $r^2 \geq 0.98$ ; Fig 3B). These five tagging SNPs showed an allelic imbalance pattern in WGS data of Wt/Mul individuals (Fig 3C),  
136 due to a disproportionally high number of reads, supporting alternative alleles on the duplication haplotypes. There was no  
137 SNP uniquely tagging CNs 4-6 separately, due to their similar and recent haplotypic background.

138

## 139 **Recent positive selection strongly favoured a haplotype harbouring the GC CNV**

140 In livestock breeding, artificial selection for economically important traits (i.e. high CM resistance) potentially drives desired  
141 alleles to fixation and removes alleles with negative effects (i.e. low CM resistance) from the population. Thus, it is intriguing  
142 that the allele associated with low CM resistance (CNs 4-6) is highly frequent in Dutch HF cattle (combined AF=0.58). We  
143 postulated two alternative hypotheses: (1) GC CNV is pleiotropic, conferring positive effects on different traits under selection,  
144 contrary to a negative effect on CM resistance, or (2) GC CNV is in high LD with a causal variant of a strongly selected trait,  
145 and therefore, genetic hitch-hiking increased the frequency of the low CM resistance allele. In both cases, the GC CNV would  
146 be associated with a selected haplotype. Thus, BTA 6 was scanned for signatures of selection based on integrated Haplotype  
147 Score (iHS [32,33]), using WGS haplotypes from the 266 HF animals. Of the two strong signals of selection identified near the  
148 79 and 89 Mb regions ( $-\log_{10}P>5$ ; S4 Fig), the latter was only ~200 kb away from the GC CNV, and thus was further inspected  
149 (Fig 4A). The extended haplotype homozygosity (EHH), centered at the iHS lead SNP (BTA 6:88,861,709, AF=0.28) revealed a  
150 strongly favoured haplotype, which extended outwards further than the non-selected haplotypes (Fig 4B). As expected, CNs  
151 4-6 were located in the strongly selected haplotype, whereas CN 1 was in the non-selected haplotypes. In addition, this finding  
152 was in line with our HBD results, where homozygous CNV carriers (CNs 4-6) shared long HBD haplotypes, whereas  
153 homozygous non-CNV carriers (CN 1) did not. These findings supported our hypothesis that a strong positive selection acted  
154 upon the region containing the GC CNV. Given the antagonistic effects of the CM resistance QTL on MY [13] and relevance to  
155 dairy cattle breeding [34], we deemed MY as a potential target of the selection signature we identified. To confirm whether  
156 CM resistance and MY are modulated by the same variant (pleiotropy) or two different variants (LD), the 10-Mb window (BTA  
157 6:84-93 Mb) harbouring the GC CNV was fine-mapped for MY. A strong association signal appeared in 89.08 Mb region, ~400  
158 kb away from the GC CNV ( $-\log_{10}P=7.5$ ; Fig 4A). The lead SNP was found at 89,077,838-bp and the G allele was associated  
159 with high MY, whereas the T allele was associated with low MY (AF=0.45). Regardless of the ~400-Kb distance, the MY lead  
160 SNP and the GC CNV were in high LD ( $r^2=0.88$ ). Of note, the iHS lead SNP was located between the association signals for CM  
161 resistance and MY (Fig 4A). We re-evaluated the EHH results and found that the strongly selected haplotype harbours CNs  
162 4-6 alleles of the GC CNV and the G allele of the MY lead SNP, implying that the strong selection resulted in low CM resistance  
163 and high MY (Fig 4B). We sought to disentangle these two QTL further, to elucidate whether they are in LD or pleiotropy.  
164 However, due to a high LD and limitation in the data set (only 13 out of ~4,000 bulls carrying favourable recombinant  
165 haplotypes), this was not possible with the current data.

166 Additionally, we fine-mapped other dairy cattle traits, in an attempt to identify other potential selection target trait(s). Our  
167 results showed that the GC CNV was the lead variant for body condition score (BCS) and calving interval (CI;  $-\log_{10}P=21.4$  and  
168 6.6, respectively). Notably, GC CNV had a stronger association signal for BCS than it did for MY (S5 Fig). The CNs 4-6 allele,

169 which was associated with low CM resistance, was correlated with low BCS (meaning low body fat content) and longer CI  
170 (meaning low fertility). The SNP association p-values obtained from either CM resistance and BCS or CM resistance and CI,  
171 clearly colocalized, underlining that these QTL are driven by the same variant, which is likely to exert pleiotropic effects on  
172 each of these traits (S4 Fig and S2 Table).

173

## 174 **GC is the most functionally relevant gene underlying the CM resistance QTL on BTA 6**

175 Our GWAS results hinted at transcriptional regulation as an underlying mechanism(s) of the CM resistance QTL, as our GWAS  
176 lead SNP was found in non-coding region. Thus, we mapped *cis*-expression QTL (further referred to as eQTL), to (1) identify  
177 shared variant(s) that are driving both GWAS and eQTL signals, and (2) to corroborate the causality of the candidate gene *GC*  
178 in the major CM resistance QTL. Prior to eQTL mapping, we firstly determined the most biologically relevant tissue(s) for our  
179 investigation. In the human transcriptome database [35–40], *GC* is predominantly expressed in the liver, whereas breast  
180 tissue showed no expression (S3 Table). Also, previous dairy cattle transcriptome studies showed that *GC* is expressed in the  
181 liver, kidney, and cortex, but not in the mammary gland [12,13,41]. Therefore, we performed eQTL mapping within the *cis*-  
182 regulatory range (+/- 1Mb region from the *GC* CNV), using liver RNA-seq data and Bovine HD genotype of lactating HF cows  
183 (n=175). Since *GC* CNV is not in the BovineHD array, the *GC* CNV genotypes were obtained by (1) imputing BovineHD  
184 genotypes to WGS level variants and (2) genotyping the *GC* CNV directly. Direct genotyping was done by targeting six  
185 polymorphic sites (CN 1 as reference allele and CNs 4-6 as alternative allele) in the *GC* CNV (S4 Table). The best probe  
186 (BTA6:88,683,517) among the six showed 100% compatibility with the imputed *GC* CNV genotypes, underlining that our  
187 imputation approach was robust. Hence, we used the imputed genotypes (BTA6:87-89 Mb) to map eQTL further. The RNA-  
188 seq data was mapped using a reference guided method, where both reference annotated transcripts and novel transcripts  
189 can be discovered. Our RNA-seq data detected two different *GC* transcript isoforms: a canonical and an alternative transcript  
190 (Fig 5A). The former consisted of 13 exons and accounted for a majority of overall *GC* expression (~98%). The latter shared  
191 the first 12 exons with the canonical transcript, however, it used an alternative 3' exon, the 14<sup>th</sup> exon, which is located inside  
192 the *GC* CNV. Expression of the alternative transcript was relatively low (~2% of the total *GC* expression). The reference gene  
193 set used for transcript assembly included the canonical form, but not the alternative transcript. Thus, *GC* gene-level eQTL  
194 mapping was done on the canonical form, and we additionally mapped transcript-level eQTL for the alternative *GC* transcript.  
195 Of the 13 genes annotated within the *cis*-regulatory range of CNV (+/- 1 Mb), *GC* was abundantly expressed ( $\geq 5,000$   
196 transcripts per million (TPM)) and other genes were either lowly expressed ( $0.1 < \text{TPM} < 50$ ), or not expressed (Fig 5B). Our  
197 gene-level eQTL mapping results discovered highly significant *cis*-eQTL for *GC* and *SLC4A4*. The *GC cis*-eQTL was found in the  
198 BTA 6:88.68-88.89 Mb region ( $-\log_{10}P > 23$ ; Fig 5D). The *GC* CNV was one of the top variants within the eQTL peak ( $-\log_{10}P=24.4$ )  
199 and was in high LD with the *GC* eQTL lead SNP ( $-\log_{10}P=25.4$ ;  $r^2=0.88$ ). P-values for *GC* expression and CM resistance were



200 highly correlated ( $\rho=0.68$ ; Fig 5E), where CNs 4-6 were associated with increased *GC* expression and low CM resistance (Fig  
201 5F). The *SLC4A4* *cis*-eQTL was found in BTA 6:88.67-89.07 Mb ( $-\log_{10}P > 7$ , S6 Fig). The lead SNP for *SLC4A4* eQTL (BTA  
202 6:88,672,979,  $-\log_{10}P=7.75$ ) was found ~9 kb away from GC CNV, which also showed high significance ( $-\log_{10}P=7.1$ ). The GC  
203 CNV and the lead SNP for *SLC4A4* eQTL were in high LD with GC CNV ( $r^2=0.99$ ). P-values obtained from *SLC4A4* eQTL mapping  
204 and CM resistance were highly correlated ( $\rho=0.82$ ), and CNs 4-6 were associated with increased *SLC4A4* expression (S6 Fig).  
205 Additionally, we detected a transcript-level eQTL for the alternative *GC* transcript. Intriguingly, the eQTL signal was driven by  
206 GC CNV tagging SNPs, followed by the second most significant variant, GC CNV ( $-\log_{10}P=16.9$  and  $16.4$ , respectively; Fig 5G).  
207 P-values for alternative *GC* transcript expression and CM resistance were correlated even stronger than the canonical  
208 transcript ( $\rho=0.74$ ; Fig 5H), where CNs 4-6 corresponded to an increased expression of the alternative *GC* transcript (Fig 5F).  
209 Our results indicate *GC* as a promising candidate gene, given the strong eQTL signal. On the contrary, high LD between GC  
210 CNV and the *SLC4A4* eQTL lead SNP ( $r^2=0.99$ ), implied that *SLC4A4* could be a candidate gene. To prioritize between the two  
211 candidate genes *GC* and *SLC4A4*, we used summary data-based Mendelian randomization (SMR) analysis [42], which  
212 estimates associations between phenotype and gene expression, aiming at identifying a functionally relevant gene,  
213 underlying GWAS hits. Our result showed *GC* to be the only gene whose expression was significantly associated with CM  
214 resistance association ( $-\log_{10}P=6$ ), whereas *SLC4A4* was below the statistical threshold ( $-\log_{10}P=4.9$ ; S5 Table). A subsequent  
215 analysis, heterogeneity in dependent instruments (HEIDI), was conducted to test whether the significant association between  
216 GWAS hit and eQTL shown for *GC* was induced by a single underlying variant or two variants that are in LD (i.e. GWAS hit  
217 variant is in LD with eQTL lead SNP). The result suggested a single underlying variant modulating both CM resistance GWAS  
218 and *GC* eQTL ( $P_{\text{HEIDI}} = 0.06$ ). Thus, we confirmed *GC* as the most promising causal gene underlying CM resistance QTL, whose  
219 expression affects the CM resistance phenotype.

220

## 221 **A putative enhancer located in the *GC* CNV likely modulates the level of *GC* expression**

222 We subsequently exploited epigenomic data sets to infer the functions of candidate variants in the 200-kb *GC* eQTL region  
223 (BTA 6:88.68-88.89 Mb; Fig 6A). Bovine liver epigenomic data, interrogating two histone modifications (ChIP-seq for H3K27ac  
224 and H3K4me3 marks) [43] and open chromatin regions (ATAC-seq) [manuscript in preparation] were investigated to infer  
225 functional contexts (i.e. active promoters and enhancers). The ChIP-seq data predicted one active promoter and three active  
226 enhancers, overlapping with ATAC-seq peaks, supporting the active status of the regulatory elements along *GC* (Fig 6A). Of  
227 the three putative enhancers identified, *GC* harbours two putative enhancers: one located inside the GC CNV (further referred  
228 to as GC CNV enhancer), and could be considered highly active, given the strong H3K27 acetylation mark. According to the  
229 comparative genomics catalogue of regulatory elements in liver [43], the GC CNV enhancer is cattle-specific, whereas the  
230 intronic enhancer is conserved between human, mouse, cow, and dog. These two putative enhancers were both supported

231 by corresponding ATAC-seq signals, with a stronger peaks for the GC CNV enhancer (Fig 6A). Additionally, this strong ATAC  
232 signal overlapped with a repetitive element, MER115, from the DNA transposon family, hAT-Tip100 (Fig 6B). Some DNA  
233 transposons obtain enhancer function during evolution [44], and hAT-Tip100 was shown to function as enhancer in humans  
234 [43]. However, although the human orthologous region harbours MER115, this repeat did not show enhancer activity in  
235 humans [40], underlining cattle-specific enhancer activity. Finally, we scanned the ATAC peak region inside the GC CNV,  
236 searching for transcription factor binding (TFB) motifs using Homer [45]. We found strong evidence for five motifs, including  
237 transcriptional enhancer factor (*TEAD*) and hepatocyte nuclear factor 4 alpha (*HNF4A*), supporting for the presence of the  
238 active enhancer within the GC CNV (Fig 6C).

239

240

## 241 Discussion

242 In this study, we dissected a prominent CM resistance QTL in Dutch HF cattle, by integrating GWAS, eQTL, and functional  
243 (epi)genomics data. Our findings revealed that the GWAS lead variant is the GC CNV, a 12-kb multi-allelic CNV, which harbours  
244 a putative *cis*-regulatory element which targets *GC*. This CNV drives both the CM resistance association and the *GC* eQTL  
245 signals, underscoring *GC* as the likely causal gene underlying this QTL.

246 Identifying causal variants from GWAS can be challenging, since, often non-causal SNPs in high LD with the causal variant  
247 appear as lead SNPs [30]. Notably, our GWAS candidate SNP (rs110813063) has not been considered a strong candidate in  
248 other fine-mapping studies [7,13,14]. The function of our lead SNP, located 4-kb downstream of *GC*, was equally elusive,  
249 compared to other candidate SNPs that were located in the intronic region of or upstream of *GC* [7,13–15]. Nonetheless, the  
250 allelic imbalance pattern in our candidate SNP (Fig 3C), together with a previous report about a CNV in high LD with the GWAS  
251 candidate SNP [13], motivated us to speculate that the CNV might be the causal variant. As expected, we corroborated that  
252 our GWAS lead SNP, rs110813063, is a perfect tag SNP of the GC CNV ( $r^2=1$ ). There are several explanations why previous  
253 fine-mapping studies missed rs110813063. Possibly, this SNP was absent in the GWAS variant set, as the standard SNP quality  
254 control (QC) criteria (i.e. removing SNPs with high depth and/or unbalanced allelic ratio) tend to eliminate SNPs inside CNVs.  
255 Alternatively, rs110813063 was present, but wrongly genotyped, due to highly disproportional allelic depth (Fig 3C). Hence,  
256 one may wonder whether a SNP-based GWAS approach, relying on a stringent QC, is sufficient in identifying causal variants,  
257 in a form other than point mutations. The answer might depend on the type of variant: studies showed that most deletions  
258 are well captured by tagging SNPs, whereas most duplications and multi-allelic CNVs are poorly tagged [46,47]. Thus, an  
259 exploratory check for presence of CNVs might be beneficial for fine-mapping studies.

260 To connect the discovery from statistical associations to the molecular function, we showed that the association mapping  
261 signal was driven by the underlying molecular signal, expression of *GC* (Fig 5). Many heritable diseases are manifested in a  
262 tissue-specific manner [48]. Our trait of interest, CM, is manifested in the mammary glands, and hence it was considered a  
263 biologically relevant tissue for eQTL mapping. However, both large-scale human transcriptome databases (S2 Table) and  
264 cattle transcriptome studies indicated liver as the main organ of *GC* expression [1–3]. This discrepancy shows that prior  
265 knowledge of tissue-specific manifestation of a trait is crucial for elucidating its molecular basis. In cattle, eQTL data was  
266 generated from diverse tissues (adrenal gland, blood, liver, mammary gland, milk, and muscle) [49–55], and some studies  
267 utilized the data sets in confirming causality of candidate genes [49–51,53]. We expect that the availability of eQTL data sets  
268 of diverse tissues and cell types will lead to rapid discovery and confirmation of candidate genes in farm animals in the future.  
269 Bovine epigenomic data sets were utilized to prioritize candidate variants for the CM resistance QTL and eQTL for *GC*  
270 expression. The ChIP-seq and ATAC-seq data supported three active enhancers and one active promoter in the region of  
271 interest (Fig 6A). Of these regulatory elements, the GC CNV enhancer is considered the most likely causal variant, as multiple

272 copies of enhancers can increase the target gene expression [56]. Hence, we propose that altered *GC* expression, mediated  
273 via multiplied enhancers, is likely the key regulatory mechanism for this QTL. Interestingly, candidate causal variants  
274 reported by previous studies [13,14] were found in the 1<sup>st</sup> intron of or upstream of *GC*, where an active enhancer and an  
275 active promoter were found (Fig 6A). In humans, tissue-specific enhancers outnumber protein coding genes [40,57]. Hence,  
276 a gene can be regulated by more than one enhancer, and a secondary enhancer is referred to as a shadow enhancer [58]. A  
277 recent study showed that redundant enhancers function in an additive manner, thus conferring phenotypic robustness (e.g.  
278 activities of multiple enhancers act together, thus removal of an enhancer still results in discernible phenotypes) [59]. In light  
279 of this finding, we speculate that the two enhancers located in *GC*, might have additive effects on *GC* expression.

280 Mammalian enhancers evolve rapidly, compared to promoters [43]. Also, rapidly evolving enhancers were exapted from  
281 ancestral DNA sequences and associated with positively selected genes [43]. The *GC* CNV enhancer is likely one of these  
282 rapidly evolving enhancers, given that (1) it exapted *MER115*, which does not function as enhancer in other species, (2) it is  
283 found in a selective sweep which harbors *GC*, and (3) it is cattle-specific. These findings strongly suggest that utilizing  
284 epigenomic data of species other than the one of interest, can be misleading, as it lacks species-specific regulatory elements.  
285 This provides a compelling reason to build species-specific epigenome maps, as already embarked upon by the international  
286 Functional Annotation of Animal Genomes (FAANG) project [60,61]. With this community effort, a wider range of species-  
287 specific regulatory elements underlying economically important QTL is expected to be unraveled in the future.

288 The major CM resistance QTL is known to have antagonistic effects for MY [13,14] and our results confirmed this. The trade-  
289 off between CM resistance and MY suggests that this locus might be under balancing selection [62]. One of the drivers of  
290 balancing selection is strong directional selection, which is common in livestock breeding [63]. Of the two traits of interest,  
291 MY has been the primary goal of dairy cattle breeding [34], and hence it seems plausible to assume that this locus is under  
292 balancing selection. Next to this, we had a particular interest in understanding the genetic basis of the antagonistic effects.  
293 The genetic modes considered were (1) a single pleiotropic variant affecting two traits and (2) two independent causal  
294 variants for each trait, in high LD. In case of pleiotropy, a particular genomic region cannot enhance both traits simultaneously  
295 through breeding. However, in case of LD, selection for recombinant haplotypes, containing favourable alleles for both traits,  
296 enables simultaneous improvement on the two traits. Only a small number (0.3%) of the studied animals had recombinant  
297 haplotypes (13 out of 4,142 bulls), and hence our data set lacks sufficient power to distinguish LD from pleiotropy. Future  
298 studies might consider two approaches for discerning this issue. The first is to exploit a daughter design by obtaining sufficient  
299 daughters of the 13 recombinant haplotype carrier Dutch HF bulls [64]. Another possibility would be to harness data from  
300 different breed(s). A dairy cattle breed that has both MY and CM resistance recorded, yet with low LD in the QTL region,  
301 would be most useful. Otherwise, a meta-GWAS of multiple cattle populations can aid in distinguishing between LD and  
302 pleiotropy.

303 We attempted to integrate the findings from the current study and further speculate on how *GC* expression and CM resistance  
304 are linked, assuming that the level of *GC* expression and DBP is correlated; meaning absence of post-transcriptional  
305 /translational regulation (Fig 7). DBP binds to and transports vitamin D [65], yet it plays additional roles in bone development,  
306 fatty acid transport, actin scavenging, and modulating inflammatory responses (see [23,66] for review). To start with, DBP  
307 modulates immunity as a macrophage activating factor (DBP-MAF), when deglycosylated via glycosidases of T- and B- cells  
308 [67,68] and therefore enhances the immune response. Accordingly, we could hypothesize that CNV carriers have larger  
309 amounts of DBP, and subsequently improved immunity, leading to higher CM resistance. However, this hypothesis contradicts  
310 with our findings, as CNV carriers were shown to have lower CM resistance. Alternatively, DBP regulates the amount of freely  
311 circulating vitamin D metabolites [69]. According to the free hormone hypothesis, only free vitamin D metabolites are able  
312 to cross the cell membrane, and are thus biologically available [70]. In humans, only 0.03 % of 25(OH)D, an indicator of vitamin  
313 D, is free, whereas the majority of vitamin D is bound either to DBP (85%) or to albumin (15%) [69]. Under these circumstances,  
314 CNV carriers, having a large pool of DBP, can be hypothesized to have lower levels of biologically available vitamin D, as  
315 postulated in human studies [71,72]. Thus, presumably, if CNV carriers have low amounts of free vitamin D, which may be  
316 termed as ‘vitamin D deficiency’, low CM resistance in these animals seems like a logical consequence (Fig 7).

317 Although vitamin D has been considered crucial in bone health [24], a recent review showed an inverse correlation between  
318 vitamin D concentrations and an extensive range of ill-health outcomes in humans [73]. Given the pervasive association  
319 between vitamin D and health conditions, there may be other associated traits induced by vitamin D deficiency. Indeed, we  
320 found strong association signals for BCS and CI, exerted by the *GC* CNV, implying its pleiotropic effects for multiple traits (S5  
321 Fig). The CNs 4-6, which were associated with low CM resistance, were associated with longer CI, meaning poor fertility. CI, a  
322 measure of duration from one calving to the next, is an indicator of fertility issues such as perturbations in the oestrous cycle,  
323 and/or anovulation [74]. Human studies reported ovarian dysfunction induced by vitamin D deficiency [75]. This finding  
324 provides convincing evidence that the *GC* CNV might be the underlying variant inducing vitamin D deficiency and suboptimal  
325 female fertility. Furthermore, pleiotropic effects of the *GC* CNV indicated that CNs 4-6 were associated with low CM resistance  
326 and low BCS. This finding fits with the results found in HF cattle where low BCS was genetically correlated with high disease  
327 incidence [76], although the causal relationship between CM resistance and BCS remains unknown. Intriguingly, human  
328 studies showed contradictory results: obesity, a condition analogous to high BCS, predisposes patients to vitamin D deficiency,  
329 leading to disease susceptibility [51]. These opposing consequences of body composition traits possibly hint at an ‘optimum’  
330 body fat amount, where an organism can function well without compromising its health.

## 331 **Conclusions**

332 In this study, we dissected the major CM resistance QTL on BTA 6, integrating GWAS, CNV calling, eQTL mapping, and  
333 functional prioritization of candidate variants. We revealed a multi-allelic CNV harbouring a strong enhancer targeting *GC*, as

334 the likely causative variant. Our findings revealed that the candidate causal gene *GC* is likely regulated by an enhancer located  
335 in the GC CNV. We speculate that GC CNV carriers which were shown to have high *GC* expression would have a larger amount  
336 of DBP, and by extension low amount of biologically available vitamin D. This physiological condition probably puts animals  
337 into a state analogous to vitamin D deficiency and leads to low CM resistance. Moreover, we report evidence of pleiotropic  
338 effects of the GC CNV for other economically important traits as BCS, CI, and MY, which revolves around the vitamin D  
339 pathway. The current study provides a novel example of multiplicated *cis*-regulatory elements playing pleiotropic roles on  
340 various polygenic traits in dairy cattle.

341

342

## 343 **Materials and methods**

### 344 **Whole genome sequencing and variant discovery**

#### 345 **Whole genome sequence data**

346 The genomes of 266 Dutch HF animals were sequenced. These 266 animals were closely related animals, where 240 were  
347 forming parents-offspring trios. The biological materials were either from sperm (males) or whole blood (females and males).  
348 Whole genome Illumina Nextera PCR free libraries were constructed (550bp insert size) following the protocols provided by  
349 the manufacturer. Illumina HiSeq 2000 instrument was used for sequencing, with a paired end protocol (2x100bp) by the  
350 GIGA Genomics platform (University of Liège). The data was aligned using BWA mem (version 0.7.9a-r786) [77] to the bovine  
351 reference genome UMD3.1, and converted into bam files using SAMtools 1.9 [78]. Subsequently, the bam files were sorted  
352 and PCR duplicates were marked with Sambamba (version 0.4.6) [79]. All samples had minimum mean sequencing depth of  
353 15X and the mean coverage of the bam files was 26X.

#### 354 **SNP calling and imputation panel construction**

355 Variant calling was done using GATK Haplotype caller in N+1 mode. We applied Variant Quality Score Recalibration (VQSR) at  
356 truth sensitivity filter level of 97.5 to remove spurious variants. Using the trusted SNP and indel data sets which are explained  
357 elsewhere [80], we observed that the VQSR step filtered out GC CNV tagging SNPs, possibly due to the overwhelmingly high  
358 depth in this region. Yet, GC CNV tagging SNPs were considered crucial in our research, as we considered that they could tag  
359 the GC CNV. Therefore, the genotypes of the GC CNV tagging SNPs obtained from the raw variant calling format (VCF) file  
360 were inserted in the VQSR filtered VCF file. While inspecting the CNV tagging SNPs, we discovered genotyping errors (three  
361 errors among 5 tagging SNPs of 266 individuals), where Ref/Alt was wrongly genotyped as Alt/Alt, due to severe allelic  
362 imbalance (where the number of alternative allele supporting reads is predominantly high). Using parent-offspring  
363 relationships available in our data set, we confirmed that these were true errors, and hence they were manually corrected.  
364 Finally, the VCF file of sequence level variants in BTA 6:84-94Mb, containing manually corrected GC CNV tagging SNPs was  
365 obtained. This VCF file, consisting of 45,820 variants of 266 animals was used as an imputation panel for fine-mapping  
366 analyses. For analyses related to haplotype segregation among the 266 sequenced animals, haplotype sharing among carriers  
367 and identification of selection signatures, we further applied stringent variant filters on the VCF file as explained in [81] to  
368 conserve only highly confident variants and to remove spurious genotyping and map errors.

### 369 **Genome-wide association studies**

#### 370 **Phenotype and genotype data**

371 We obtained genotype and phenotypic data of 4,142 progeny tested HF bulls from Dutch HF cattle breeding programme (CRV  
372 B.V., Arnhem, the Netherlands). The phenotype data was consisting of 60 traits, which are routinely collected in the breeding

373 programme, including clinical mastitis resistance (S6 Table). The estimated breeding values (EBVs) were de-regressed to  
374 correct for the contribution of family members and de-regressed EBVs were used as phenotypes in GWAS. The effective  
375 daughter contributions of the 4,142 bulls for CM resistance ranged between 25 and 971.3, with an average of 204.3. The  
376 4,142 bulls were genotyped with a low density genotyping array (16K). Afterwards, the 16K genotype data was imputed in  
377 two steps, firstly to 50K density, based on two private versions of a Bovine 50K genotyping array, and the panel was consisting  
378 of 1,964 HF animals. It was further imputed to a higher density, using a panel of 1,347 HF animals genotyped with Illumina  
379 BovineHD BeadChip (770K). Subsequently, the data was imputed to sequence level using the HF WGS imputation panel  
380 described above. The imputation was done with Beagle 4 [82], and variants with low minor allele frequency (MAF < 0.025)  
381 and low imputation accuracy (allele  $R^2 < 0.9$ ) were filtered out.

### 382 **Association model and conditional analysis**

383 To confirm the presence of CM resistance QTL on BTA 6 in the Dutch HF population, we performed association mapping using  
384 imputed high density genotypes (BovineHD (770K) reference panel). The association mapping was performed SNP-by-SNP  
385 with a linear mixed model in GCTA [83]. The following model was fitted :

$$386 \quad \mathbf{y} = \mathbf{1}\boldsymbol{\mu} + \mathbf{X}\mathbf{b} + \mathbf{g} + \mathbf{e}$$

387 where  $\mathbf{y}$  is the vector of phenotypes (de-regressed EBVs),  $\mathbf{1}$  is a vector of ones,  $\boldsymbol{\mu}$  is the overall mean,  $\mathbf{X}$  is a vector of SNP  
388 genotypes coded as biallelic variant (0, 1, or 2),  $\mathbf{b}$  is the additive effect of the SNP which is being tested for association,  $\mathbf{g}$  is  
389 the polygenic effect captured by a genomic relationship matrix (GRM; random effect), and  $\mathbf{e}$  is the residual. The GRM was  
390 built with GCTA, based on 50K genotypes to avoid losing statistical power by including causal markers [84]. The model  
391 assumed equal residual variances. A SNP was regarded significantly associated with CM, when  $-\log_{10}P$  value was above 6.45  
392 (chromosome-wide Bonferroni multiple-testing correction for 28,669 tests), at a nominal significance of  $p = 0.01$ .  
393 Subsequently, we repeated the association analysis in the BTA 6:84-94 Mb region, using the imputed sequence level variants  
394 ( $n=45,820$ ) to fine-map the QTL. The association model used was same as described above. Finally, to test if the lead SNP  
395 explained the QTL signal completely we ran a conditional association analysis for the imputed sequence variants in BTA 6:84-  
396 94 Mb region with the lead SNP as a covariate in the model.

### 397 **CNV discovery and characterization of GC CNV**

398 The CNV was called from the WGS data of 266 animals, using the Smoove pipeline (<https://github.com/brentp/smoove>). This  
399 pipeline collects split and discordant reads using Samblaster [85], and then calls CNVs using Lumpy [86]. Afterwards, the CNV  
400 sites were genotyped using SVTyper (<https://github.com/hall-lab/svtyper>). Additionally, we used Duphold [87] to calculate  
401 read depth of the CNs at the GC CNV locus. Duphold exploits read depth between copy number variable regions and normal  
402 regions and calculates the ratio between these two. The integer diploid CNs obtained based on the Duphold coverage ratio  
403 values were assigned to the 266 animals. The CN distribution showed peaks at diploid CNs of 2, and 5-10, implying four



404 haploid CNs (1, 4, 5, and 6) segregating at the GC CNV locus. Thus, possible haplotypic combinations for the diploid CNs would  
405 be: 2 (1/1), 5 (1/4), 6 (1/5), 7 (1/6), 8 (4/4), 9 (4/5), 10 (4/6 or 5/5). There was only one haplotypic combination possible for  
406 all the diploid CNs, except 10, were either (4/6) or (5/5) could form diploid CN 10. We confirmed the true presence of these  
407 CN alleles by taking advantage of our family structure. First, we verified that observed genotypes followed the Mendelian  
408 segregation rules. Next, we also checked that CN alleles transmission within the pedigree was in agreement with haplotype  
409 transmission. Haplotypes were reconstructed using familial information and linkage information using LINKPHASE3  
410 programme [88]. The program estimates also, at each marker position and for each parent-offspring pair, the probability that  
411 a progeny inherited the paternal or the maternal haplotype for its parents.

412 To study the relationship between different CN alleles, we estimated homozygous-by-descent (HBD) probabilities at the CNV  
413 locus, and measured length of identified HBD segments. To that end, we ran with RZooRoH [89] a multiple HBD-class model  
414 described in [90], with four HBD classes and one non-HBD class with rates equal to 10, 100, 1000, 10,000 and 10,000,  
415 respectively. As this approach compares haplotypes within individuals, it does not require haplotype reconstruction and is  
416 not affected by eventual phasing errors.

## 417 **Selection signature analyses**

418 The BTA 6 was scanned for haplotype based selection signatures observed in the sequence variants from the 266 animals.  
419 We used the integrated haplotype homozygosity score (iHS [33]) using 'rehh' R package [32] for within-population analysis of  
420 recent selection signatures. In order to unravel the selection target trait(s) we identified a number of traits within the  
421 routinely collected catalogue of 60 traits showing QTL signals in the 84-94Mb region on BTA 6 based on 16K GWAS results  
422 (EuroGenomics custom SNP chip [91]). Hence, we performed GWAS for these traits (BCS, CI, and MY) in BTA 6:84-94Mb region  
423 based on imputed WGS variants to fine-map those QTL. The input files and the association model for the GWASs were the  
424 same as described above, except that phenotypes used de-regressed EBVs of BCS, CI, and MY, respectively. The GWAS results  
425 of these traits were plotted against the GWAS result of CM resistance to characterize the colocalization of QTL signals, using  
426 the R package "LocusComparer" [92].

## 427 **eQTL mapping and Summary data-based Mendelian randomization analysis**

### 428 **RNA-seq data and eQTL mapping**

429 We used RNA-seq data produced by the Gpluse consortium (<http://www.gpluse.eu/>; EBI ArrayExpress: E-MTAB-9348 and  
430 9871)(Wathes et al; accepted but not online yet). Briefly, liver biopsy samples were collected from ~14 day post-partum HF  
431 cows (n=178). The procedures had local ethical approval and complied with the relevant national and EU legislation under  
432 the European Union Regulations 2012 (S.I. No. 543 of 2012). RNA-seq libraries were constructed using Illumina TruSeq  
433 Stranded Total RNA Library Prep Ribo-Zero Gold kit (Illumina, San Diego, CA) and sequenced on Illumina NextSeq 500  
434 sequencer with 75-nucleotide single-end reads to reach average 32 million reads per sample. The reads were aligned to the

435 bovine reference genome UMD3.1 and its corresponding gene coordinates from UCSC as a reference using HISAT2 [93].  
436 Transcript assembly was conducted with StringTie [94], using reference-guided option for transcript assembly, which enables  
437 discovery of novel transcripts that are not present in the reference gene set. Reads were counted at gene- or transcript-level  
438 using StringTie. After data normalization using DESeq2 [95], we performed principal component (PC) analyses and removed  
439 outliers ( $PC > 3.5$  standard deviations from the mean for the top four PCs,  $n=2$ ). Subsequently, the gene expression levels  
440 were corrected with Probabilistic Estimation of Expression Residuals (PEER) [96]. All animals were genotyped using Illumina  
441 BovineHD Genotyping BeadChip (770K). The genotype data was imputed to WGS level, using the imputation panel explained  
442 above, using Beagle 4 [82] and variants with low minor allele frequency ( $MAF < 0.025$ ) and low imputation accuracy (allele  $R^2$   
443  $< 0.9$ ) were filtered out. Finally, the PEER corrected normalized gene expression was associated with the imputed WGS  
444 variants for 175 samples, using a linear model in R package “MatrixEQTL” [97].

#### 445 **Prioritizing the causal gene**

446 We prioritized the most functionally relevant gene for the CM resistance QTL on BTA 6, using SMR (version 1.03) [42], to  
447 estimate association between phenotype and gene expression. Input data required were summary statistics from CM  
448 resistance GWAS and eQTL mapping results explained above. Additionally, the program requires plink format genotype data  
449 to analyse LD in the region of interest, for which the imputed WGS variants (BTA 6:84-94 Mb) of 4,142 bulls were used. A  
450 subsequent analysis, heterogeneity in dependent instruments (HEIDI), was conducted to test whether the significant  
451 association between GWAS hit and eQTL shown for GC was induced by a single underlying variant or two variants that are in  
452 LD (i.e. GWAS hit variant is in LD with eQTL lead SNP). The statistical thresholds for SMR ( $-\log_{10}P > 5$ ) and HEIDI ( $P > 0.05$ ) were  
453 benchmarked from the original paper [42].

#### 454 **Functional genomics assay data**

455 The human transcriptome data bases were examined to find out in which tissue GC is highly expressed via Ensembl website  
456 (release 101; [98]). We downloaded liver ChIP-seq data (H3K27ac and H3K4me3) generated from four bulls from ArrayExpress  
457 (E-MTAB-2633 [43]). This ChIP-seq data was aligned to the bovine reference genome UMD3.1 using Bowtie2 [42] and peaks  
458 were called using MACS2 [99]. A catalogue of mammalian regulatory element conservation  
459 (<https://www.ebi.ac.uk/research/flieck/publications/FOG15>) was used to infer the conservation of the regulatory elements  
460 predicted from the ChIP-seq data sets. Next, ATAC-seq data was explored to see if chromatin accessible regions coincided  
461 with the histone marks obtained from the ChIP-seq data. We obtained a male calf's liver ATAC-seq data from the GplusE  
462 consortium (ArrayExpress accession number: E-MTAB-9872). Data was analysed by following the ENCODE Kundaje lab ATAC-  
463 seq pipeline (<https://www.encodeproject.org/pipelines/ENCPL792NWO/>). Sequences were trimmed using Trimmomatic [41]  
464 and aligned on the bovine reference genome UMD3.1 using Bowtie2 [42]. After filtering out low quality, multiple mapped,  
465 mitochondrial, and duplicated reads using SAMtools [43] and the Picard Toolkit (<http://broadinstitute.github.io/picard/>),

466 fragments with map length  $\leq 146$  bp were kept as nucleosome-free fraction. Genomic loci targeted by TDE1 were defined  
467 as 38-bp regions centered either 4 (plus strand reads) or 5-bp (negative strand reads) downstream of the read's 5'-end. ATAC-  
468 seq peaks were called using MACS2 [99] (narrowPeak with options --format BED, --nomodel, --keep-dup all, --qvalue 0.05, --  
469 shift -19, --extsize 38). We inspected the presence of an enhancer in the human orthologous region of the GC CNV, using  
470 ENCODE data [40] in the UCSC genome browser [100]. Transcription factor (TF) binding motifs in ATAC-seq peak regions were  
471 discovered using Homer [45]. The TF motifs that are expressed in bovine or human liver are kept and shown in the figure  
472 [101,102].

473

## 474 **EuroGenomics custom array genotyping**

475 We attempted to directly genotype the GC CNV in a biallelic mode (CN 1 as reference allele and CNs 4-6 as alternative allele).  
476 Probes targeting six polymorphic sites were designed in Illumina DesignStudio Custom Assay Design Tool were added to  
477 custom part of the EuroGenomics array [91] (S4 Table). DNA was extracted from the same biological material used for RNA-  
478 seq used for eQTL mapping (described above), and genotyped for the EuroGenomics array by the GIGA Genomics platform  
479 (University of Liège). The SNP genotypes were assessed using Illumina GenomeStudio software. Average call rate per probe  
480 was calculated to assess the quality of the probes. Finally, genotypes obtained from the highest quality (BTA6:88,683,517)  
481 was compared to the imputed GC CNV genotypes.

482

## 483 **Acknowledgements**

484 The Dutch HF whole genome sequence population data set was funded by the DAMONA ERC advanced grant to Michel  
485 Georges. The authors are grateful to Elias Kaiser for discussion on the Vitamin D pathway, Ole Madsen for discussion on  
486 functional genomics data, Martijn Derks for providing advice on CNV calling pipeline, and the GplusE consortium for  
487 providing data for eQTL mapping and ATAC-seq.

488

## 489 **Author contribution**

490 **Conceptualization:** Michel Georges, Carole Charlier, Aniek Bouwman

491 **Data Curation:** Wouter Coppieters, Latifa Karim, Gabriel Costa Monteiro Moreira, Haruko Takeda, Erik Mullaart, Ruth  
492 Appeltant

493 **Formal analysis:** Young-Lim Lee, Tom Druet, Haruko Takeda

494 **Funding Acquisition:** Roel Veerkamp, Michel Georges

495 **Investigation:** Young-Lim Lee, Tom Druet, Haruko Takeda

496      **Methodology:** Aniek Bouwman, Tom Druet, Haruko Takeda

497      **Resources:** Erik Mullaart

498      **Supervision:** Carole Charlier, Mirte Bosse, Tom Druet, Aniek Bouwman, Michel Georges, Martien Groenen, Roel Veerkamp

499      **Visualization:** Young-Lim Lee

500      **Writing – original draft preparation:** Young-Lim Lee

501      **Writing – review & editing:** Young-Lim Lee, Carole Charlier, Mirte Bosse, Tom Druet, Aniek Bouwman, Michel Georges,

502      Martien Groenen, Roel Veerkamp, Wouter Coppieters, Latifa Karim, Gabriel Costa Monteiro Moreira, Haruko Takeda, Erik

503      Mullaart, Ruth Appeltant

504

505

## 506 References

- 507 1. Halasa T, Huijps K, Østerås O, Hogeveen H. Economic effects of bovine mastitis and mastitis  
508 management: A review. *Vet Q.* 2007;29(1):18–31.
- 509 2. Zwald NR, Weigel KA, Chang YM, Welper RD, Clay JS. Genetic Selection for Health Traits Using  
510 Producer-Recorded Data . I . Incidence Rates , Heritability Estimates , and Sire Breeding Values. *J Dairy*  
511 *Sci [Internet].* 2004;87(12):4287–94. Available from: [http://dx.doi.org/10.3168/jds.S0022-](http://dx.doi.org/10.3168/jds.S0022-0302(04)73573-0)  
512 [0302\(04\)73573-0](http://dx.doi.org/10.3168/jds.S0022-0302(04)73573-0)
- 513 3. Bloemhof S, Jong G De, Haas Y De. Genetic parameters for clinical mastitis in the first three lactations  
514 of Dutch Holstein cattle. *Vet Microbiol.* 2009;134:165–71.
- 515 4. Negussie E, Lidauer M, Nielsen US, Aamand GP. Combining Test Day SCS with Clinical Mastitis and  
516 Udder Type Traits: A Random Regression Model for Joint Genetic Evaluation of Udder Health in  
517 Denmark, Finland and Sweden. In: *Interbull Bulletin.* 2010. p. 25–32.
- 518 5. Jamrozik J, Koeck A, Miglior F, Kistemaker GJ, Schenkel FS, Kelton DF, et al. Genetic and Genomic  
519 Evaluation of Mastitis Resistance in Canada. In: *Interbull Bulletin.* 2013. p. 43–51.
- 520 6. Pritchard T, Coffey M, Mrode R, Wall E. Genetic parameters for production, health, fertility and longevity  
521 traits in dairy cows. *Animal.* 2013;7(1):34–46.
- 522 7. Sahana G, Guldbbrandtsen B, Thomsen B, Holm LE, Panitz F, Brøndum RF, et al. Genome-wide  
523 association study using high-density single nucleotide polymorphism arrays and whole-genome  
524 sequences for clinical mastitis traits in dairy cattle. *J Dairy Sci [Internet].* 2014;97(11):7258–75.  
525 Available from: <http://dx.doi.org/10.3168/jds.2014-8141>
- 526 8. Abdel-Shafy H, Bortfeldt RH, Reissmann M, Brockmann GA. Short communication: Validation of somatic  
527 cell score-associated loci identified in a genome-wide association study in German Holstein cattle. *J*  
528 *Dairy Sci [Internet].* 2014;97(4):2481–6. Available from: <http://dx.doi.org/10.3168/jds.2013-7149>
- 529 9. Sahana G, Guldbbrandtsen B, Thomsen B, Lund MS. Confirmation and fine-mapping of clinical mastitis  
530 and somatic cell score QTL in Nordic Holstein cattle. *Anim Genet.* 2013;44(6):620–6.
- 531 10. Sodeland M, Kent MP, Olsen HG, Opsal MA, Svendsen M, Sehested E, et al. Quantitative trait loci for  
532 clinical mastitis on chromosomes 2, 6, 14 and 20 in Norwegian Red cattle. *Anim Genet.*  
533 2011;42(5):457–65.
- 534 11. Veerkamp RF, Bouwman AC, Schrooten C, Calus MPL. Genomic prediction using preselected DNA  
535 variants from a GWAS with whole-genome sequence data in Holstein-Friesian cattle. *Genet Sel Evol.*  
536 2016;48(1):1–14.
- 537 12. Freebern E, Santos DJA, Fang L, Jiang J, Parker Gaddis KL, Liu GE, et al. GWAS and fine-mapping of  
538 livability and six disease traits in Holstein cattle. *BMC Genomics.* 2020;21(1):1–11.
- 539 13. Olsen HG, Knutsen TM, Lewandowska-Sabat AM, Grove H, Nome T, Svendsen M, et al. Fine mapping of  
540 a QTL on bovine chromosome 6 using imputed full sequence data suggests a key role for the group-  
541 specific component (GC) gene in clinical mastitis and milk production. *Genet Sel Evol.* 2016;48(1):1–  
542 16.
- 543 14. Cai Z, Guldbbrandtsen B, Lund MS, Sahana G. Prioritizing candidate genes post-GWAS using multiple  
544 sources of data for mastitis resistance in dairy cattle. *BMC Genomics.* 2018;19(1):1–11.
- 545 15. Tribout T, Croiseau P, Lefebvre R, Barbat A, Boussaha M, Fritz S, et al. Confirmed effects of candidate  
546 variants for milk production, udder health, and udder morphology in dairy cattle. *Genet Sel Evol*  
547 *[Internet].* 2020;52(1):1–26. Available from: <https://doi.org/10.1186/s12711-020-00575-1>
- 548 16. Koivula M, Mäntysaari EA, Negussie E, Serenius T. Genetic and phenotypic relationships among milk  
549 yield and somatic cell count before and after clinical mastitis. *J Dairy Sci.* 2005;88(2):827–33.
- 550 17. Cai Z, Dusza M, Guldbbrandtsen B, Lund MS, Sahana G. Distinguishing pleiotropy from linked QTL  
551 between milk production traits and mastitis resistance in Nordic Holstein cattle. *Genet Sel Evol*  
552 *[Internet].* 2020;52(1):19. Available from:  
553 <https://gsejournal.biomedcentral.com/articles/10.1186/s12711-020-00538-6>
- 554 18. Jiang J, Ma L, Prakapenka D, VanRaden PM, Cole JB, Da Y. A large-scale genome-wide association study  
555 in U.S. Holstein cattle. *Front Genet.* 2019;10(MAY).
- 556 19. Abo-Ismael MK, Brito LF, Miller SP, Sargolzaei M, Grossi DA, Moore SS, et al. Genome-wide association  
557 studies and genomic prediction of breeding values for calving performance and body conformation traits  
558 in Holstein cattle. *Genet Sel Evol.* 2017;49(82):1–29.
- 559 20. Nayeri S, Sargolzaei M, Abo-Ismael M, Miller S, Schenkel F, Moore S, et al. Genome-wide association  
560 study for lactation persistency, female fertility, longevity, and lifetime profit index traits in Holstein  
561 dairy cattle. *J Dairy Sci [Internet].* 2017;100(2):1246–58. Available from:  
562 <http://dx.doi.org/10.3168/jds.2016-11770>
- 563 21. Pausch H, Emmerling R, Schwarzenbacher H, Fries R. A multi-trait meta-analysis with imputed  
564 sequence variants reveals twelve QTL for mammary gland morphology in Fleckvieh cattle. *Genet Sel*  
565 *Evol.* 2016;48(1):1–9.
- 566 22. Xiang R, van den Berg I, MacLeod IM, Daetwyler HD, Goddard ME. Effect direction meta-analysis of  
567 GWAS identifies extreme, prevalent and shared pleiotropy in a large mammal. *Commun Biol [Internet].*  
568 2020;3(1):1–14. Available from: <http://dx.doi.org/10.1038/s42003-020-0823-6>
- 569 23. Gomme PT, Bertolini J. Therapeutic potential of vitamin D-binding protein. *TRENDS Biotechnol*  
570 *Biotechnol.* 2004;22(7).
- 571 24. Horst RL, Reinhardt TA, Reddy GS. Vitamin D Metabolism. In: Feldman D, Pike JW, Adams JS, editors.  
572 *Vitamin D.* 2nd ed. 2005. p. 15–36.

- 573 25. Jolliffe DA, Walton RT, Grif CJ, Martineau AR. Single nucleotide polymorphisms in the vitamin D  
574 pathway associating with circulating concentrations of vitamin D metabolites and non-skeletal health  
575 outcomes : Review of genetic association studies. *J Steroid Biochem Mol Biol.* 2016;164:18–29.
- 576 26. Poindexter MB, Kweh MF, Zimpel R, Zuniga J, Lopera C, Zenobi MG, et al. Feeding supplemental 25-  
577 hydroxyvitamin D 3 increases serum mineral concentrations and alters mammary immunity of lactating  
578 dairy cows. *J Dairy Sci.* 2020;103:805–22.
- 579 27. Merriman KE, Powell JL, Santos JEP, Nelson CD. Intramammary 25-hydroxyvitamin D3 treatment  
580 modulates innate immune responses to endotoxin-induced mastitis. *J Dairy Sci [Internet].*  
581 2018;101(8):7593–607. Available from: <http://dx.doi.org/10.3168/jds.2017-14143>
- 582 28. Zimin A V., Delcher AL, Florea L, Kelley DR, Schatz MC, Puiu D, et al. A whole-genome assembly of the  
583 domestic cow, *Bos taurus*. *Genome Biol.* 2009;10(4).
- 584 29. CRV. Breeding value Udder Health (Manual Quality, Chapter E-27) [Internet]. 2020 [cited 2020 Aug  
585 25]. Available from: [https://cooperatiecrv-be6.kxcdn.com/wp-content/uploads/2020/04/E\\_27-](https://cooperatiecrv-be6.kxcdn.com/wp-content/uploads/2020/04/E_27-Uiergezondheid-April-2020-Engels.pdf)  
586 [Uiergezondheid-April-2020-Engels.pdf](https://cooperatiecrv-be6.kxcdn.com/wp-content/uploads/2020/04/E_27-Uiergezondheid-April-2020-Engels.pdf)
- 587 30. Gallagher MD, Chen-plotkin AS. The Post-GWAS Era : From Association to Function. *Am J Hum Genet*  
588 [Internet]. 2018;102(5):717–30. Available from: <https://doi.org/10.1016/j.ajhg.2018.04.002>
- 589 31. Kommadath A, Grant JR, Krivushin K, Butty AM, Baes CF, Carthy TR, et al. A large interactive visual  
590 database of copy number variants discovered in taurine cattle. *Gigascience.* 2019;8(6):1–12.
- 591 32. Gautier M, Klassmann A, Vitalis R. rehh 2.0: a reimplementatation of the R package rehh to detect  
592 positive selection from haplotype structure. *Mol Ecol Resour.* 2017;17(1):78–90.
- 593 33. Voight BF, Kudaravalli S, Wen X, Pritchard JK. A map of recent positive selection in the human genome.  
594 *PLoS Biol [Internet].* 2006;4(3):e72. Available from: <http://www.ncbi.nlm.nih.gov/pubmed/16494531>
- 595 34. Miglior F, Fleming A, Malchiodi F, Brito LF, Martin P, Baes CF. A 100-Year Review: Identification and  
596 genetic selection of economically important traits in dairy cattle. *J Dairy Sci [Internet].*  
597 2017;100(12):10251–71. Available from: <http://dx.doi.org/10.3168/jds.2017-12968>
- 598 35. Ardlie KG, DeLuca DS, Segrè A V., Sullivan TJ, Young TR, Gelfand ET, et al. The Genotype-Tissue  
599 Expression (GTEx) pilot analysis: Multitissue gene regulation in humans. *Science.*  
600 2015;348(6235):648–60.
- 601 36. Brawand D, Soumillon M, Necsulea A, Julien P, Csárdi G, Harrigan P, et al. The evolution of gene  
602 expression levels in mammalian organs. *Nature.* 2011;478(7369):343–8.
- 603 37. Lizio M, Abugessaisa I, Noguchi S, Kondo A, Hasegawa A, Hon CC, et al. Update of the FANTOM web  
604 resource: Expansion to provide additional transcriptome atlases. *Nucleic Acids Res.* 2019;47(D1):D752–  
605 8.
- 606 38. Fagerberg L, Hallstrom BM, Oksvold P, Kampf C, Djureinovic D, Odeberg J, et al. Analysis of the human  
607 tissue-specific expression by genome-wide integration of transcriptomics and antibody-based  
608 proteomics. *Mol Cell Proteomics.* 2014;13(2):397–406.
- 609 39. Papatheodorou I, Fonseca NA, Keays M, Tang YA, Barrera E, Bazant W, et al. Expression Atlas: Gene  
610 and protein expression across multiple studies and organisms. *Nucleic Acids Res.* 2018;46(D1):D246–  
611 51.
- 612 40. The ENCODE Project Consortium. An integrated encyclopedia of DNA elements in the human genome.  
613 *Nature.* 2012;489(7414):57–74.
- 614 41. Fang L, Sahana G, Su G, Yu Y, Zhang S. Integrating Sequence-based GWAS and RNA-Seq Provides  
615 Novel Insights into the Genetic Basis of Mastitis and Milk Production in Dairy Cattle. *Sci Rep.*  
616 2017;7(45560):1–16.
- 617 42. Zhu Z, Zhang F, Hu H, Bakshi A, Robinson MR, Powell JE, et al. Integration of summary data from  
618 GWAS and eQTL studies predicts complex trait gene targets. *Nat Genet.* 2016;48(5).
- 619 43. Villar D, Berthelot C, Aldridge S, Rayner TF, Lukk M, Pignatelli M, et al. Enhancer evolution across 20  
620 mammalian species. *Cell [Internet].* 2015;160(3):554–66. Available from:  
621 <http://dx.doi.org/10.1016/j.cell.2015.01.006>
- 622 44. Cao Y, Chen G, Wu G, Zhang X, McDermott J, Chen X, et al. Widespread roles of enhancer-like  
623 transposable elements in cell identity and long-range genomic interactions. *Genome Res.*  
624 2019;29(1):40–52.
- 625 45. Heinz S, Benner C, Spann N, Bertolino E, Lin YC, Laslo P, et al. Simple Combinations of Lineage-  
626 Determining Transcription Factors Prime cis-Regulatory Elements Required for Macrophage and B Cell  
627 Identities. *Mol Cell [Internet].* 2010;38(4):576–89. Available from:  
628 <http://dx.doi.org/10.1016/j.molcel.2010.05.004>
- 629 46. Sudmant PH, Rausch T, Gardner EJ, Handsaker RE, Abyzov A, Huddleston J, et al. An integrated map of  
630 structural variation in 2,504 human genomes. *Nature.* 2015;526(7571):75–81.
- 631 47. Handsaker RE, Van Doren V, Berman JR, Genovese G, Kashin S, Boettger LM, et al. Large multiallelic  
632 copy number variations in humans. *Nat Genet [Internet].* 2015;47(3):296–303. Available from:  
633 <http://dx.doi.org/10.1038/ng.3200>
- 634 48. Hekselman I, Yeger-Lotem E. Mechanisms of tissue and cell-type specificity in heritable traits  
635 and diseases. *Nat Rev Genet [Internet].* 2020; Available from:  
636 <http://www.ncbi.nlm.nih.gov/pubmed/31913361>
- 637 49. Littlejohn MD, Tiplady K, Lopdell T, Law TA, Scott A, Harland C, et al. Expression variants of the  
638 lipogenic AGPAT6 gene affect diverse milk composition phenotypes in *Bos taurus*. *PLoS One.*  
639 2014;9(1):1–12.
- 640 50. Littlejohn MD, Tiplady K, Fink TA, Lehnert K, Lopdell T, Johnson T, et al. Sequence-based Association  
641 Analysis Reveals an MGST1 eQTL with Pleiotropic Effects on Bovine Milk Composition. *Sci Rep.*  
642 2016;(May):1–14.

- 643 51. Kemper KE, Littlejohn MD, Lopdell T, Hayes BJ, Bennett LE, Williams RP, et al. Leveraging genetically  
644 simple traits to identify small-effect variants for complex phenotypes. *BMC Genomics*. 2016;17(1):1–9.  
645 52. Brand B, Scheinhardt MO, Friedrich J, Zimmer D, Reinsch N, Ponsuksili S, et al. Adrenal cortex  
646 expression quantitative trait loci in a German Holstein × Charolais cross. *BMC Genet*. 2016;17(1):1–11.  
647 53. Lopdell TJ, Tiplady K, Struchalin M, Johnson TJJ, Keehan M, Sherlock R, et al. DNA and RNA-sequence  
648 based GWAS highlights membrane-transport genes as key modulators of milk lactose content. *BMC*  
649 *Genomics*. 2017;18(1):1–18.  
650 54. Leal-Gutiérrez JD, Elzo MA, Mateescu RG. Identification of eQTLs and sQTLs associated with meat  
651 quality in beef. *BMC Genomics*. 2020;21(1):1–15.  
652 55. Van Den Berg I, Hayes BJ, Chamberlain AJ, Goddard ME. Overlap between eQTL and QTL associated  
653 with production traits and fertility in dairy cattle. *BMC Genomics*. 2019;20(1):1–18.  
654 56. Ngcungcu T, Oti M, Sitek JC, Haukanes BI, Linghu B, Bruccoleri R, et al. Duplicated Enhancer Region  
655 Increases Expression of CTSS and Segregates with Keratolytic Winter Erythema in South African and  
656 Norwegian Families. *Am J Hum Genet* [Internet]. 2017;100(5):737–50. Available from:  
657 <http://dx.doi.org/10.1016/j.ajhg.2017.03.012>  
658 57. Long HK, Prescott SL, Wysocka J. Ever-Changing Landscapes: Transcriptional Enhancers in  
659 Development and Evolution. *Cell* [Internet]. 2016;167(5):1170–87. Available from:  
660 <http://dx.doi.org/10.1016/j.cell.2016.09.018>  
661 58. Scholes C, Biette KM, Harden TT, DePace AH. Signal Integration by Shadow Enhancers and Enhancer  
662 Duplications Varies across the Drosophila Embryo. *Cell Rep* [Internet]. 2019;26(9):2407–2418.e5.  
663 Available from: <https://doi.org/10.1016/j.celrep.2019.01.115>  
664 59. Osterwalder M, Barozzi I, Tissières V, Fukuda-yuzawa Y, Mannion BJ, Afzal SY, et al. Enhancer  
665 redundancy provides phenotypic robustness in mammalian development. *Nat Publ Gr*. 2018;  
666 60. Giuffra E, Tuggle CK. Functional Annotation of Animal Genomes (FAANG): Current Achievements and  
667 Roadmap. *Annu Rev Anim Biosci*. 2019;7:65–88.  
668 61. The FAANG Consortium, Andersson L, Archibald AL, Bottema CD, Brauning R, Burgess SC, et al.  
669 Coordinated international action to accelerate genome-to-phenome with FAANG, the Functional  
670 Annotation of Animal Genomes project. *Genome Biol*. 2015;16(1):4–9.  
671 62. Hedrick PW. Heterozygote Advantage : The Effect of Artificial Selection in Livestock and Pets. *J Hered*.  
672 2015;106(2):141–54.  
673 63. Georges M, Charlier C, Hayes B. Harnessing genomic information for livestock improvement. *Nat Rev*  
674 *Genet* [Internet]. 2019;20(3):135–56. Available from: <http://dx.doi.org/10.1038/s41576-018-0082-2>  
675 64. Georges M. Mapping , Fine Mapping , and Molecular Dissection of Quantitative Trait Loci in Domestic  
676 Animals. *Annu Rev Genomics Hum Genet*. 2007;8:131–62.  
677 65. Daiger SP, Mel S, Cavalli-Sforza LL. Group-Specific Component ( Gc ) Proteins Bind Vitamin D and 25-  
678 Hydroxyvitamin D. *Proc Nati Acad Sci*. 1975;72(6):2076–80.  
679 66. Bouillon R, Schuit F, Antonio L, Rastinejad F. Vitamin D Binding Protein: A Historic Overview. *Front*  
680 *Endocrinol (Lausanne)*. 2020;10(January):1–21.  
681 67. Yamamoto N, Kumashiro R. Conversion of vitamin D3 binding protein (group-specific component) to a  
682 macrophage activating factor by the stepwise action of beta-galactosidase of B cells and sialidase of T  
683 cells. *J Immunol*. 1993;151:2794–802.  
684 68. Swamy N, Dutta A, Ray R. Roles of the structure and orientation of ligands and ligand mimics inside the  
685 ligand-binding pocket of the vitamin D-binding protein. *Biochemistry*. 1997;36(24):7432–6.  
686 69. Bikle DD, Schwartz J. Vitamin D binding protein, total and free Vitamin D levels in different  
687 physiological and pathophysiological conditions. *Front Endocrinol (Lausanne)*. 2019;10(MAY):1–12.  
688 70. Chun RF, Peercy BE, Orwoll ES, Nielson CM, Adams JS, Hewison M. Vitamin D and DBP: The free  
689 hormone hypothesis revisited. *J Steroid Biochem Mol Biol* [Internet]. 2014;144(PART A):132–7.  
690 Available from: <http://dx.doi.org/10.1016/j.jsbmb.2013.09.012>  
691 71. Sinotte M, Diorio C, Berube S, Pollak M, Brisson J. Genetic polymorphisms of the vitamin D binding  
692 protein and plasma concentrations of 25-hydroxyvitamin D in premenopausal women. *Am J Clin Nutr*.  
693 2009;25(3):634–40.  
694 72. Lauridsen AL, Vestergaard P, Hermann AP, Brot C, Heickendorff L, Mosekilde L, et al. Plasma  
695 concentrations of 25-Hydroxy-Vitamin D and 1,25-Dihydroxy-Vitamin D are Related to the Phenotype of  
696 Gc (Vitamin D-Binding Protein): A Cross-sectional Study on 595 Early Postmenopausal Women. *Calcif*  
697 *Tissue Int*. 2005;25:15–22.  
698 73. Autier P, Boniol M, Pizot C, Mullie P. Vitamin D status and ill health : a systematic review. *Lancet*  
699 *Diabetes Endocrinol*. 2014;2(January):76–89.  
700 74. Santos JEP, Bisinotto RS, Ribeiro ES. Mechanisms underlying reduced fertility in anovular dairy cows.  
701 *Theriogenology* [Internet]. 2016;86(1):254–62. Available from:  
702 <http://dx.doi.org/10.1016/j.theriogenology.2016.04.038>  
703 75. Irani M, Merhi Z, D M. Role of vitamin D in ovarian physiology and its implication in reproduction : a  
704 systematic review. *Fertil Steril* [Internet]. 2014;102(2):460–468.e3. Available from:  
705 <http://dx.doi.org/10.1016/j.fertnstert.2014.04.046>  
706 76. Dechow CD, Rogers GW, Sander-Nielsen U, Klei L, Lawlor TJ, Clay JS, et al. Correlations among body  
707 condition scores from various sources, dairy form, and cow health from the United States and Denmark.  
708 *J Dairy Sci* [Internet]. 2004;87(10):3526–33. Available from: [http://dx.doi.org/10.3168/jds.S0022-](http://dx.doi.org/10.3168/jds.S0022-0302(04)73489-X)  
709 [0302\(04\)73489-X](http://dx.doi.org/10.3168/jds.S0022-0302(04)73489-X)  
710 77. Li H. Aligning sequence reads, clone sequences and assembly contigs with BWA-MEM. *arXiv Prepr arXiv*  
711 [Internet]. 2013;00(00):3. Available from: <http://arxiv.org/abs/1303.3997>  
712 78. Li H, Durbin R. Fast and accurate short read alignment with Burrows-Wheeler transform. *Bioinformatics*.  
713 2009;25(14):1754–60.

- 714 79. Tarasov A, Vilella AJ, Cuppen E, Nijman IJ, Prins P. Sambamba : fast processing of NGS alignment  
715 formats. *Bioinfo.* 2015;31(February):2032–4.
- 716 80. Kadri NK, Harland C, Faux P, Cambisano N, Karim L, Coppieters W, et al. Coding and noncoding  
717 variants in HFM1, MLH3, MSH4, MSH5, RNF212, and RNF212B affect recombination rate in cattle.  
718 *Genome Res.* 2016;1323–32.
- 719 81. Kadri N, Charlier C, Cambisano N, Deckers M, Mullaart E. High resolution mapping of cross-over events  
720 in cattle using NGS data. In: *Proceedings of the World Congress on Genetics Applied to Livestock*  
721 *Production.* 2018. p. 11.808.
- 722 82. Browning BL, Zhou Y, Browning SR. A One-Penny Imputed Genome from Next-Generation Reference  
723 Panels. *Am J Hum Genet [Internet].* 2018;103(3):338–48. Available from:  
724 <https://doi.org/10.1016/j.ajhg.2018.07.015>
- 725 83. Yang J, Lee SH, Goddard ME, Visscher PM. GCTA: A tool for genome-wide complex trait analysis. *Am J*  
726 *Hum Genet [Internet].* 2011;88(1):76–82. Available from:  
727 <http://dx.doi.org/10.1016/j.ajhg.2010.11.011>
- 728 84. Yang J, Zaitlen NA, Goddard ME, Visscher PM, Price AL. Advantages and pitfalls in the application of  
729 mixed-model association methods. *Nat Genet.* 2014;46(2).
- 730 85. Faust GG, Hall IM. SAMBLASTER : fast duplicate marking and structural variant read extraction.  
731 *Bioinformatics.* 2014;30(17):2503–5.
- 732 86. Layer RM, Chiang C, Quinlan AR, Hall IM. LUMPY : a probabilistic framework for structural variant  
733 discovery. *Genome Biol.* 2014;15(R84):1–19.
- 734 87. Pedersen BS, Quinlan AR. Duphold : scalable , depth-based annotation and curation of high-confidence  
735 structural variant calls. *Gigascience.* 2019;(March):1–5.
- 736 88. Druet T, Georges M. LINKPHASE3: An improved pedigree-based phasing algorithm robust to genotyping  
737 and map errors. *Bioinformatics.* 2015;31(10):1677–9.
- 738 89. Bertrand AR, Flori L, Druet T. RZooRoH : An R package to characterize individual genomic autozygosity  
739 and identify homozygous-by-descent segments. *Methods Ecol Evol.* 2019;2019(10):860–6.
- 740 90. Druet T, Gautier M. A model-based approach to characterize individual inbreeding at both global and  
741 local genomic scales. *Mol Ecol.* 2017;26:5820–41.
- 742 91. Boichard D, Boussaha M, Capitan A, Rocha D, Sanchez MP, Tribout T, et al. Experience from large scale  
743 use of the EuroGenomics custom SNP chip in cattle. In: *11th World Congress on Genetics Applied to*  
744 *Livestock Production.* 2018. p. 1–6.
- 745 92. Liu B, Gloudemans MJ, Rao AS, Ingelsson E, Montgomery SB. Abundant associations with gene  
746 expression complicate GWAS follow-up. *Nat Genet [Internet].* 2019;51(May). Available from:  
747 <http://dx.doi.org/10.1038/s41588-019-0404-0>
- 748 93. Kim D, Paggi JM, Park C, Bennett C, Salzberg SL. Graph-based genome alignment and genotyping with  
749 HISAT2 and HISAT-genotype. *Nat Biotechnol [Internet].* 2019;37(August). Available from:  
750 <http://dx.doi.org/10.1038/s41587-019-0201-4>
- 751 94. Pertea M, Pertea GM, Antonescu CM, Chang T-C, Mendell JT, Salzberg SL. StringTie enables improved  
752 reconstruction of a transcriptome from RNA-seq reads. *Nat Biotech.* 2016;33(3):290–5.
- 753 95. Love MI, Huber W, Anders S. Moderated estimation of fold change and dispersion for RNA-seq data with  
754 DESeq2. *Genome Biol.* 2014;15(12):1–21.
- 755 96. Stegle O, Parts L, Piipari M, Winn J, Durbin R. Using probabilistic estimation of expression residuals  
756 (PEER) to obtain increased power and interpretability of gene expression analyses. 2012;7(3):500–7.
- 757 97. Shabalin AA. Matrix eQTL : ultra fast eQTL analysis via large matrix operations. *Bioinformatics.*  
758 2012;28(10):1353–8.
- 759 98. Hunt SE, McLaren W, Gil L, Thormann A, Schuilenburg H, Sheppard D, et al. Ensembl variation  
760 resources. 2018;(8):1–12.
- 761 99. Zhang Y, Liu T, Meyer CA, Eeckhoute J, Johnson DS, Bernstein BE, et al. Model-based Analysis of ChIP-  
762 Seq (MACS). *Genome Biol.* 2008;(9):R137.
- 763 100. Kent WJ, Sugnet CW, Furey TS, Roskin KM, Pringle TH, Zahler AM, et al. The Human Genome Browser  
764 at UCSC. *Genome Res.* 2002;12(6):996–1006.
- 765 101. de Souza MM, Zerlotini A, Geistlinger L, Tizioto PC, Taylor JF, Rocha MIP, et al. A comprehensive  
766 manually-curated compendium of bovine transcription factors. *Sci Rep [Internet].* 2018;8(1):1–12.  
767 Available from: <http://dx.doi.org/10.1038/s41598-018-32146-2>
- 768 102. Liu X, Yu X, Zack DJ, Zhu H, Qian J. TiGER: A database for tissue-specific gene expression and  
769 regulation. *BMC Bioinformatics.* 2008;9:1–7.
- 770 103. Barrett JC, Fry B, Maller J, Daly MJ. Haploview: Analysis and visualization of LD and haplotype maps.  
771 *Bioinformatics.* 2005;21(2):263–5.
- 772



## 774 Figures

775

### 776 **Figure 1. Association mapping of clinical mastitis resistance on BTA6**

777 (A) Association mapping performed with imputed BovineHD variants on BTA6. The association signal near BTA 6:88.6 Mb, shown in  
778 other dairy cattle populations was replicated in the current Dutch HF population. (B) Association mapping performed with imputed  
779 WGS variants in BTA 6:84-93 Mb region. A strong association signal was shown in a 200 Kb region (BTA 6:88.5-88.7 Mb), spanning  
780 over *GC* gene. Our lead SNP (rs110813063, marked with green and vertical dotted line) has not been reported as a candidate SNP in  
781 other CM fine-mapping studies. CM candidate SNPs from other fine-mapping studies are marked as yellow. (C) Conditional analyses  
782 including GC CNV as a covariate nullify the association signal.

783

### 784 **Figure 2. Discovery of multiallelic GC duplication using deeply sequenced genomes and familial structure**

785 (A) Schematic overview showing the GWAS lead SNP and ~12 kb CNV overlapping with *GC*. *GC* is a reverse oriented gene, consisting  
786 of 14 exons, of which two last exons are non-coding. Five CNV tagging SNPs were present within the GC CNV and marked with black  
787 asterisks (the middle asterisk covers three tagging SNPs). Among them, the first SNP, which was also the GWAS lead SNP, was in  
788 perfect LD with the GC CNV ( $r^2 = 1$ ), whereas the rest were in high LD ( $r^2 > 0.98$ ). The hash marks at the upstream and the intronic  
789 region of *GC* indicate CM resistance candidate SNPs reported by others [13,14]. (B) Sequencing depth difference between the CNV  
790 region and normal region was used to infer copy numbers. (C) A Histogram of read depth values shows that majority of animals fall  
791 into diploid copy number of 2, 5 and 8, and some minor peaks occur at diploid copy number of 6, 7, 9 and 10. Based on this diploid  
792 CNs, we inferred haploid CNs of 1, 4, 5, and 6. We showed possible allelic combination(s) above each diploid CN. The diploid CN10  
793 could be comprised of CN5/CN5 and CN4/CN6, however, our results showed that it was always CN4/CN6. (D) Familial information  
794 and background haplotypes were used to phase the copy number and thus revealed how the CNV segregates in trios. The upper  
795 family tree shown with animal signs stands for diploid copy numbers, whereas the lower tree shows haploid copy numbers (the  
796 phase results of the diploid CNs).

797

### 798 **Figure 3. Characterization of the GC CNV tagging SNPs and allelic imbalance pattern**

799 (A) A schematic overview of four structural haplotypes and the five tagging SNPs inside the GC CNV, shown together with allele  
800 frequencies. (B) Positions, rs ID, alleles, location within GC of GC CNV tagging SNPs. (C) Allelic imbalance pattern shown in Wt/Dup  
801 animals. Animals will get more supporting reads for alternative alleles for the five CNV tagging SNPs, thus the tagging SNPs will be  
802 called as heterozygous but with high allelic imbalance

803

### 804 **Figure 4. Selection signature scan and trait association (clinical mastitis resistance and milk yield) GWAS plot**

805 (A) A 10-Mb region with a strong selective signature signal was zoomed in (BTA 6: 84-93 Mb). Association mapping results from  
806 imputed WGS variants on CM resistance (dark blue) and MY (yellow) are shown in the upper panel; iHS results are shown in the  
807 lower panel. The CM resistance GWAS peak occurs at the left side of the iHS peak, whereas MY GWAS peak appears on the right side  
808 of the iHS peak. The red vertical line marks GC CNV. A 1-Mb region covering GC CNV, iHS lead SNP, and MY lead SNP are marked with  
809 translucent blue. (B) The extended haplotype homozygosity of the 1-Mb region marked in panel (A) is shown, together with four  
810 genes annotated in this region (top of the figure). The major haplotype shown in the upper part (black) branches outwards, implying  
811 recent positive selection acted upon this haplotype. The non-selected haplotype, shown in the lower side (blue) rapidly breaks down  
812 from the iHS lead SNP. (C) Pairwise  $D'$  and  $r^2$  values between GC CNV, iHS lead SNP, and MY lead SNP in the ~4,000 daughter proven  
813 bulls. A screenshot made from Haploview software [103].

814

### 815 **Figure 5. eQTL mapping and GWAS-eQTL colocalization results for GC and the non-coding RNA**

816 (A) A Schematic overview of the *GC* gene structure and position of the GC CNV. Our data detected two *GC* transcripts, where the  
817 canonical form account the majority of the expression (98%) and an alternative form only counting for minor expression (2%). (B)  
818 eQTL was mapped for the genes located in a 2-Mb bin (BTA6:87.68-89.68). Of the 13 genes annotated in this bin, *GC* showed  
819 predominantly high expression (5,000 TPM <), whereas the rest were lowly expressed or not expressed at all. The eQTL were mapped  
820 for *GC* and *SLC4A4*. (C) CM resistance GWAS results were shown for the 2-Mb bin, where eQTL was mapped. The color scale indicates  
821 the degree of pair-wise LD ( $r^2$ ) between the GC CNV and other SNPs. Annotation of genes in this region is drawn as black bars. Six  
822 genes on the left part are *AMBN*, *JCHAIN*, *RUFY3*, *GRSF1*, *MOB1B*, and *DCK*. (D) eQTL mapping results for *GC* (canonical transcript).  
823 (E) P-values obtained from CM resistance GWAS and GC (canonical transcript) eQTL mapping were correlated. The GC CNV is located  
824 in the right upper corner ( $p=0.68$ ), showing that it is significant for both GWAS and eQTL mapping. (F) The box plot shows altered *GC*  
825 (canonical transcript) expression depending on GC CNV genotypes. (G) eQTL mapping result for *GC* (alternative transcript). (H) P-  
826 values obtained from CM resistance GWAS and GC (alternative transcript) eQTL mapping were correlated. The GC CNV is located in  
827 the right upper corner ( $p=0.74$ ), showing that it is significant for both GWAS and eQTL mapping. (I) The box plot shows altered *GC*  
828 (alternative transcript) expression depending on GC CNV genotypes. Panels C-E, G, H were made with LocusCompare programme  
829 [92]

830

### 831 **Figure 6. Inspection of functional elements near the GC CNV**

832 Functional elements were inspected in *GC* eQTL region using ChIP-seq (H3K27ac and H3K4me3) and ATAC-seq data. (A) The *GC* eQTL  
833 region was zoomed in. In this region, *GC* is the only annotated gene. The GC CNV is marked with the translucent blue, and CM  
834 resistance candidate SNPs reported by other studies [13,14] are marked with translucent yellow. Other significant eQTL lead SNPs in  
835 this region are marked with translucent pink. We overlaid ChIP-seq data to identify putative enhancers and promoters (ChIP-seq  
836 tracks; red). Furthermore, liver ATAC-seq data revealed highly accessible chromatin regions, supporting the regulatory elements  
837 discovered by ChIP-seq data sets (ATAC-seq tracks; blue). (B) We further zoomed in to the ATAC peak within the GC CNV, and

838 discovered that the ATAC peak overlaps with MER 115. The predicted hepatic transcription factor binding sites are marked with  
 839 translucent grey. (C) Transcription factor binding motifs are shown together with the ATAC signal located inside the GC CNV.

840  
 841 **Figure 7. Summary of the key findings and hypothesis of physiological aspects linking GC expression and CM resistance**

842 A schematic overview summarizing the allele effects of wildtype (CN 1) and multiplied (CNs 4-6) alleles of the GC CNV, a likely  
 843 causal variant for the major CM resistance QTL. The two alleles at the GC CNV locus lead to altered GC transcription, where the  
 844 multiplied alleles correspond to high GC expression. On the bottom shows the phenotypic association between the GC CNV and  
 845 CM resistance, where the multiplied allele is associated with low CM resistance. Finally, the area marked with grey shade shows  
 846 our hypotheses that the amount of DBP is positively related with the GC expression. Further, we speculated that the amount of DBP  
 847 and free vitamin D is inversely correlated, as long as vitamin D is bound by DBP, it is not biologically available. The solid arrows  
 848 indicate the relations based on our findings. The dotted arrows indicate the relations based on our speculation.

850 Fig 1

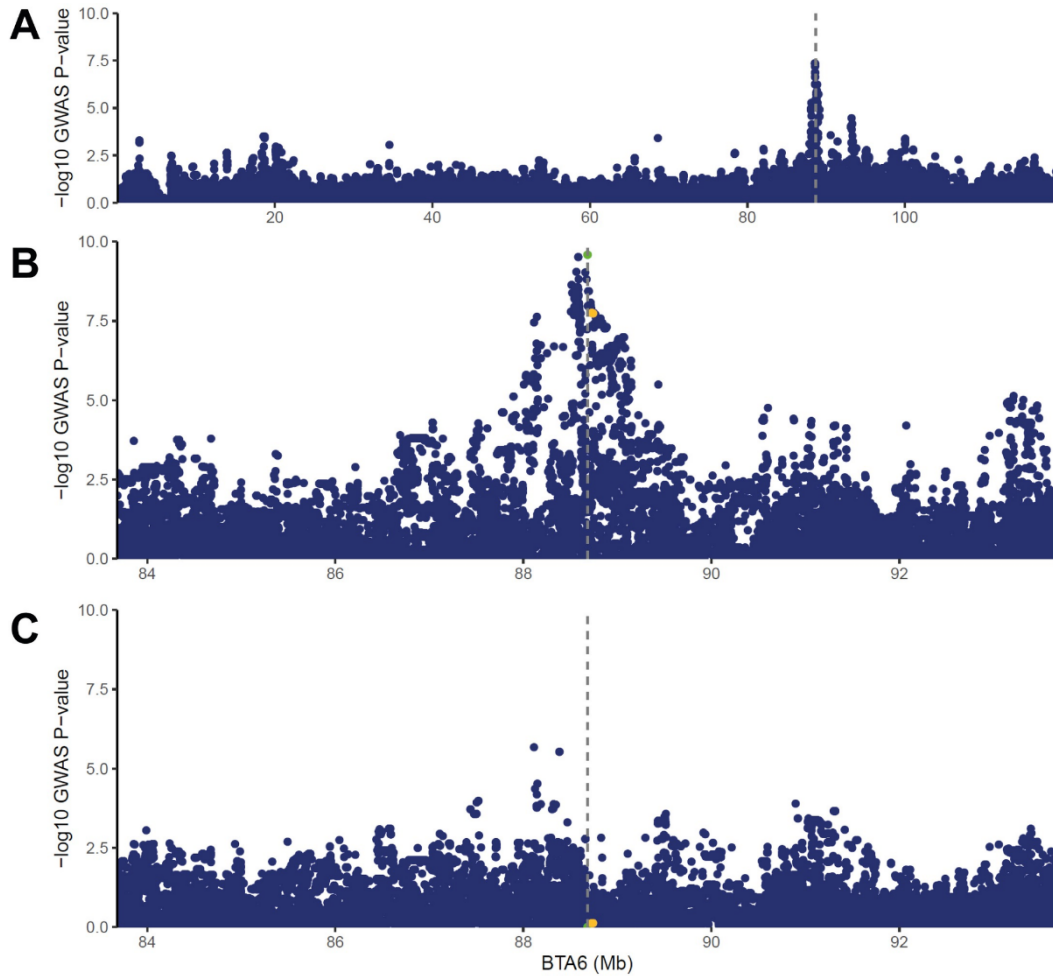

851  
 852  
 853

Fig 2

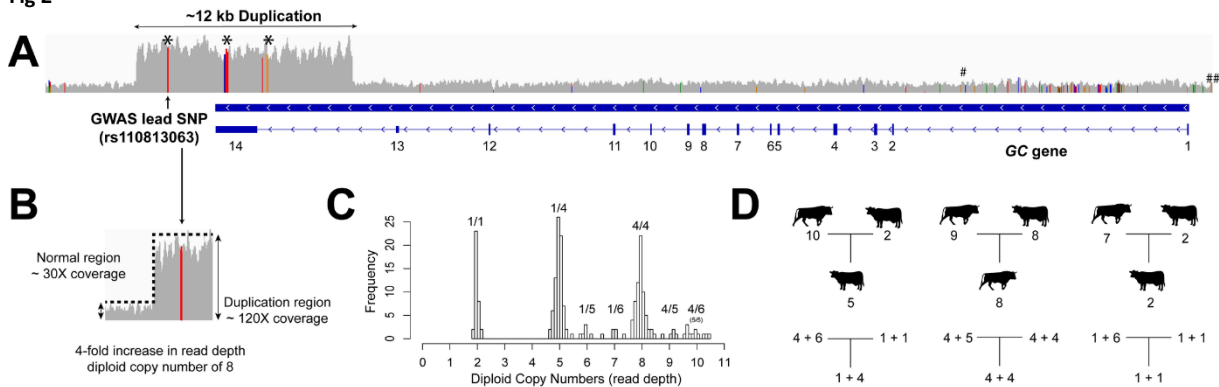

854  
 855  
 856

Fig 3

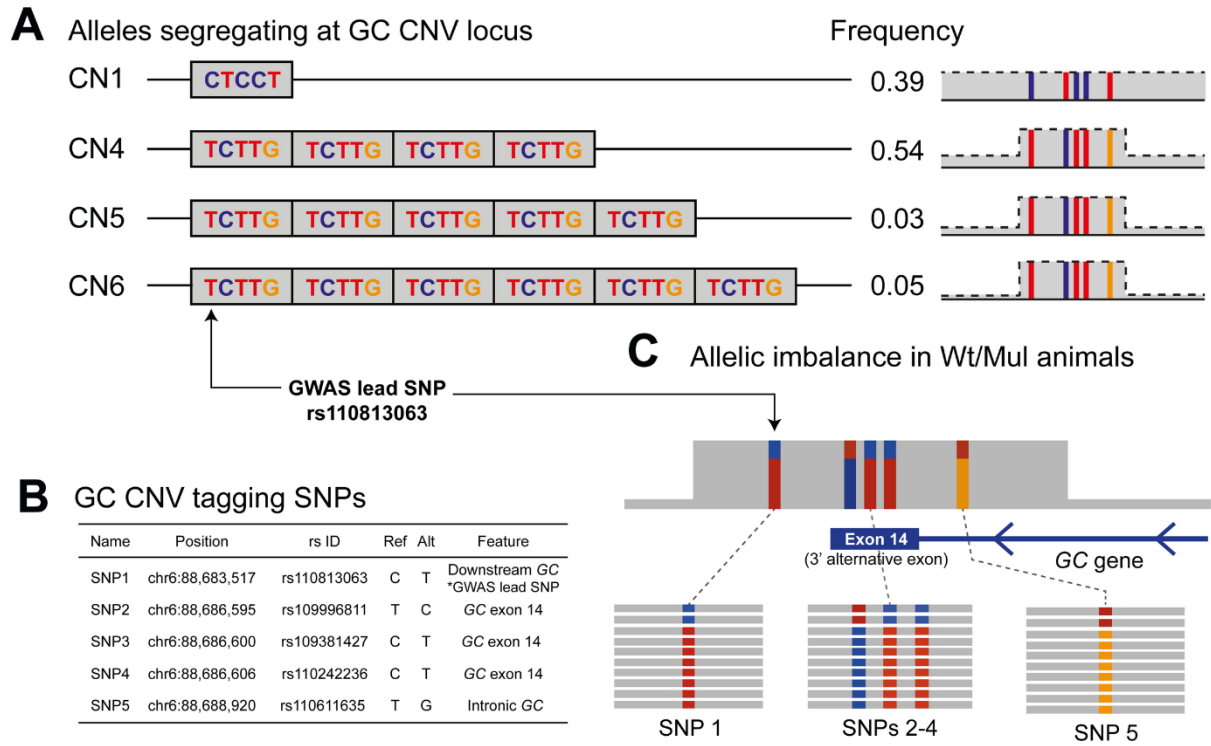

857  
858  
859

Fig 4

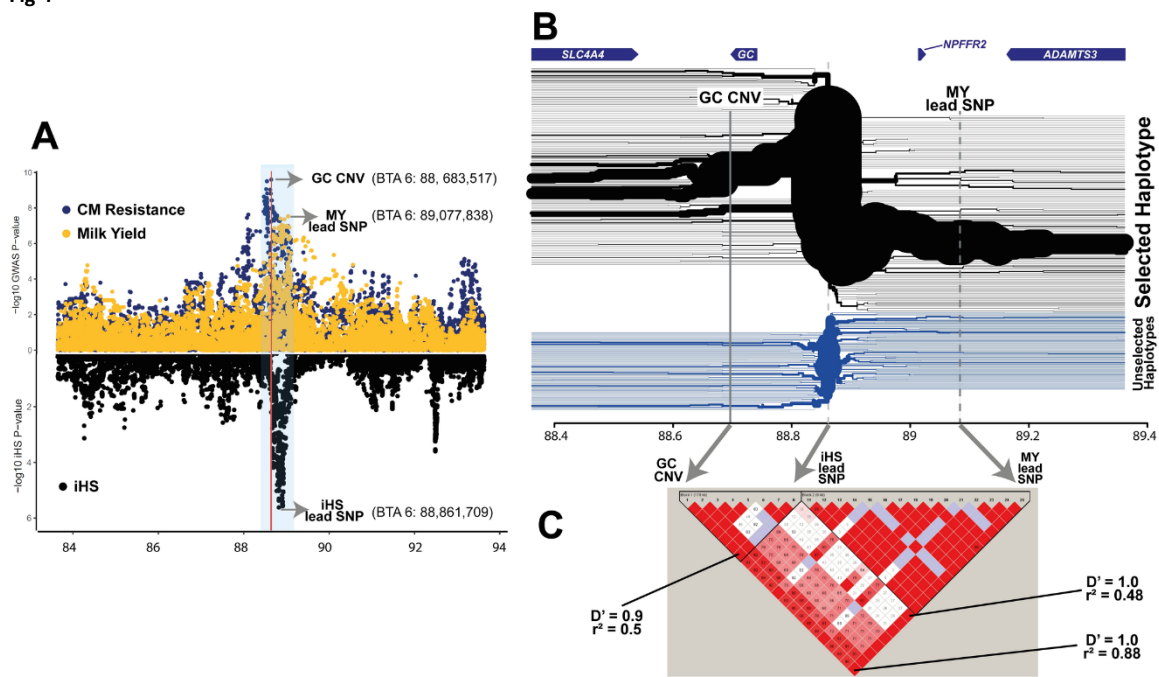

860  
861  
862

Fig 5

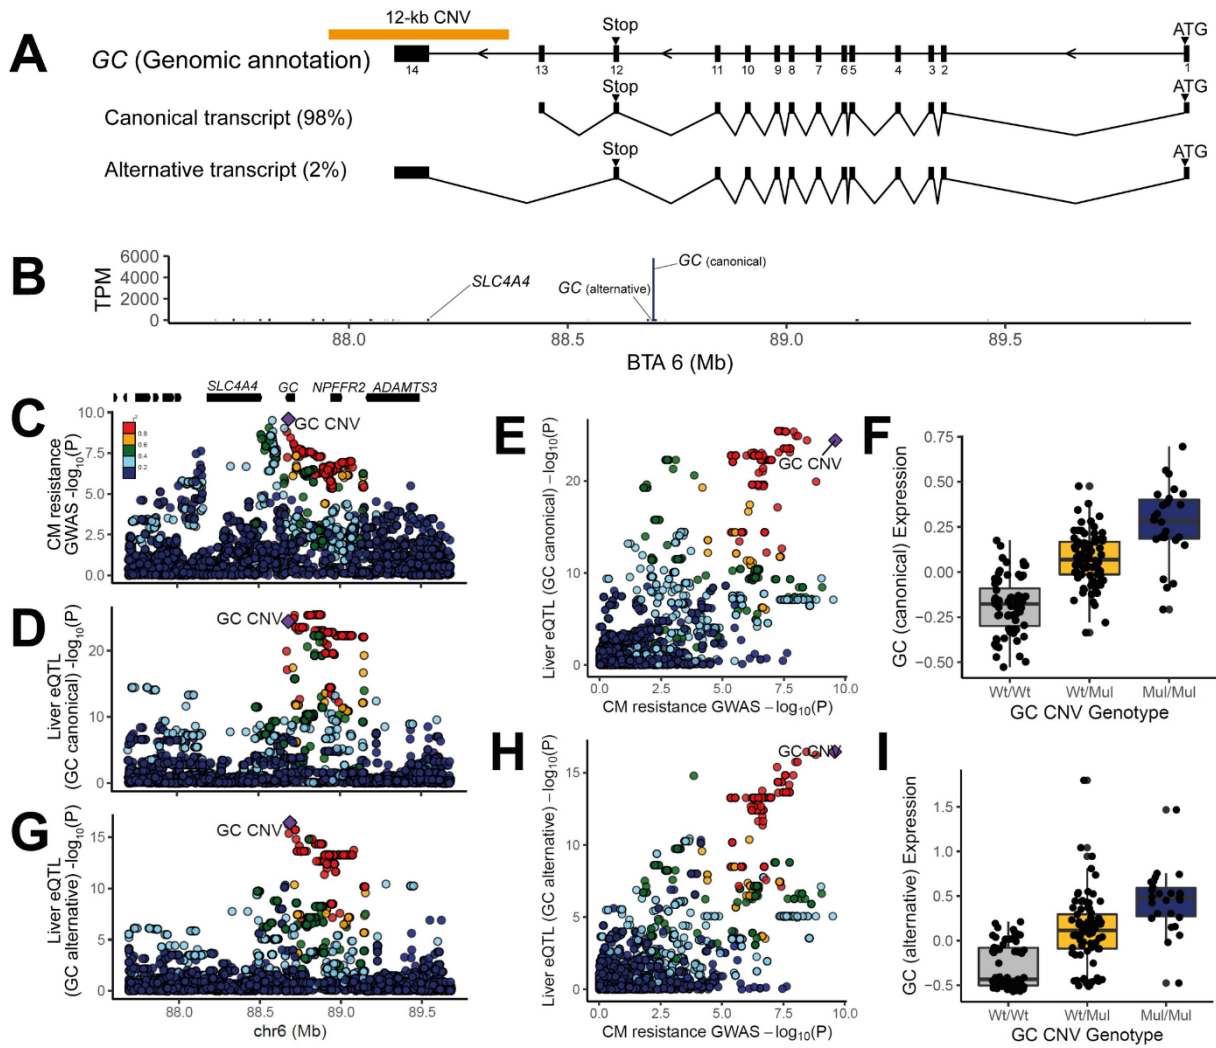

863  
 864  
 865

Fig 6

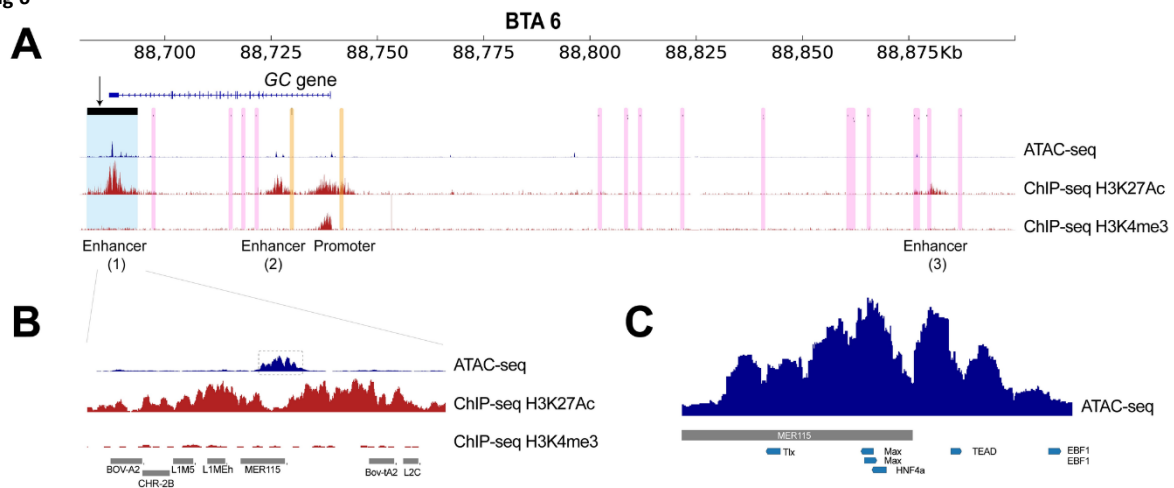

866  
 867  
 868

Fig 7

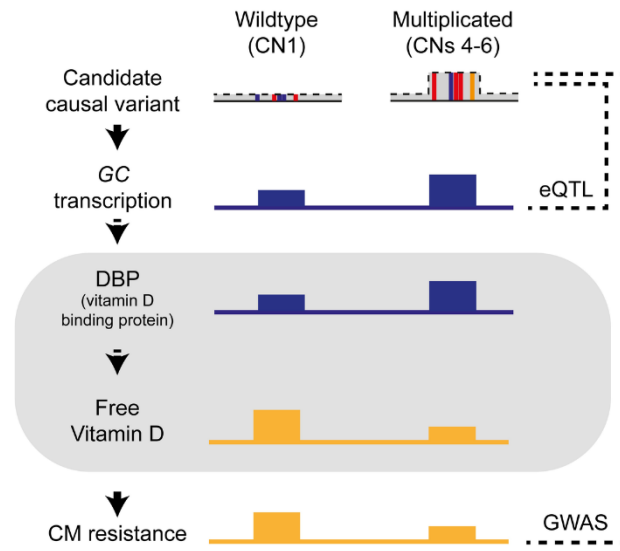

869

870

## 871 Supporting information

872  
873  
874  
875  
876  
877  
878  
879  
880  
881  
882  
883  
884  
885  
886  
887  
888  
889  
890  
891  
892  
893  
894  
895  
896  
897  
898  
899  
900  
901  
902  
903  
904  
905  
906  
907  
908  
909  
910  
911  
912  
913  
914  
915  
916  
917  
918

### **S1 Figure. Manhattan plot for CM resistance GWAS results**

Genome-wide association mapping of the CM resistance trait, performed using imputed BovineHD data

### **S2 Figure. IGV screen shots for the GC CNV and its' breakpoints**

(A) The GC CNV (BTA 6:88,681,767-88,693,553) is shown in the IGV screen shot. The grey reads are normally mapped reads, whereas green ones are discordantly mapped reads, providing evidence for a tandem duplication. The sequencing coverage of the CNV region is higher than non-CNV region. (B) The left breakpoint is flanked by MIR repeat. (C) The right breakpoint does not overlap with repeats. (D and E) The left and right breakpoints are zoomed in and the soft-clipped reads (positions where nucleotide sequences are written) information revealed the 5-bp microhomology "CACAT" (marked as yellow) at the breakpoints.

### **S3 Figure. Family tree of animals having CN 5 and CN6 allele on GC CNV locus**

In the panel of 266 animals, we observed CN 5 and CN6 alleles are mostly segregating among a small number of related animals. To show that CN5 and CN6 alleles are truly segregating, transmission probabilities at each marker position were calculated with LINKPHASE3. Transmission probabilities were estimated for paternal haplotypes (1 and 0 indicated transmission of the paternal and maternal allele, respectively). (A) Largest family of CN5 carriers. Each circle indicates one individual and the number inside the circle indicates the GC CNV copy number genotype. The numbers above each individual stand for the transmission probability. Question marks mean individuals with no copy number information. Male animals are shown as squares, female animals are shown as circles, and animals with unknown gender are marked with diamonds. (B) Largest family of CN6 carriers. The legends are identical to panel (A).

### **S4 Figure. Chromosome-wide scan of selection signatures using integrated Haplotype Score (iHS) on BTA6**

Chromosome-wide scan of integrated Haplotype Score revealed two iHS peaks with high significance ( $-\log_{10}P > 5$ ), near BTA6:78 Mb and BTA6:89 Mb.

### **S5 Figure. Three traits that showed strong association signals in CM resistance QTL region on BTA 6**

Colocalization of fine-mapping p-values of a pair of traits are showing that body condition score (BCS), calving interval (CI), and milk yield (MY) are having association signal near or at the CM resistance QTL region on BTA 6. (A) Colocalization between body condition score and CM resistance is shown in the left panel, together with the separate Manhattan plots for body condition score and CM resistance on the right. (B) Colocalization between calving interval and CM resistance. (C) Colocalization between milk yield and CM resistance. Panel layout of (B) and (C) is the same as panel (A). In each panel, the colours of dots indicate degree of LD ( $r^2$ ) with GC CNV (colour scale shown in the left upper corner of panel A). The purple diamond marks GC CNV. The figure was made with LocusCompare programme [92].

### **S6 Figure. eQTL mapping and GWAS-eQTL colocalization results for *SLC4A4***

A colocalization plot for CM resistance GWAS and *SLC4A4* eQTL mapping results is shown on the left side. The right upper panel is the CM resistance GWAS results and the right lower panel is the *SLC4A4* eQTL mapping results. In between these two right panels are the genes located in this region. Six genes on the left part are *AMBN*, *JCHAIN*, *RUFY3*, *GRSF1*, *MOB1B*, and *DCK*. In each panel, the colours of dots indicate degree of LD ( $r^2$ ) with GC CNV (colour scale shown in the left upper corner of the colocalization figure). The purple diamond marks GC CNV.

919 S1 Fig

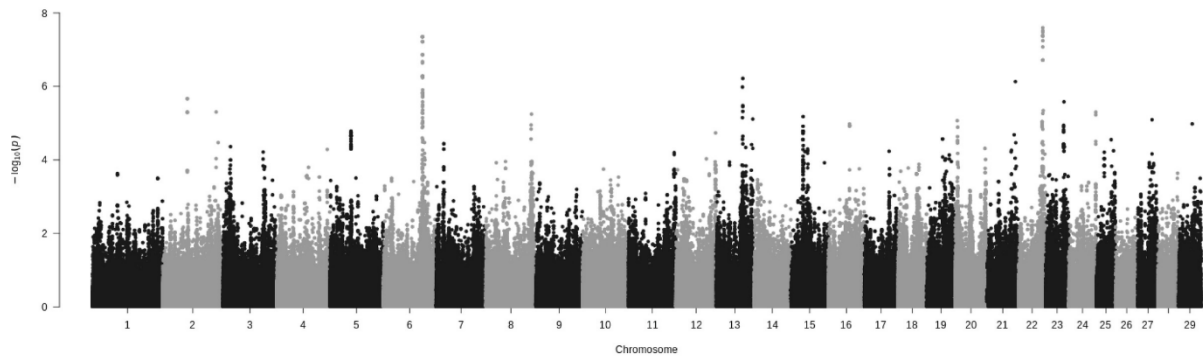

920  
921  
922

S2 Fig

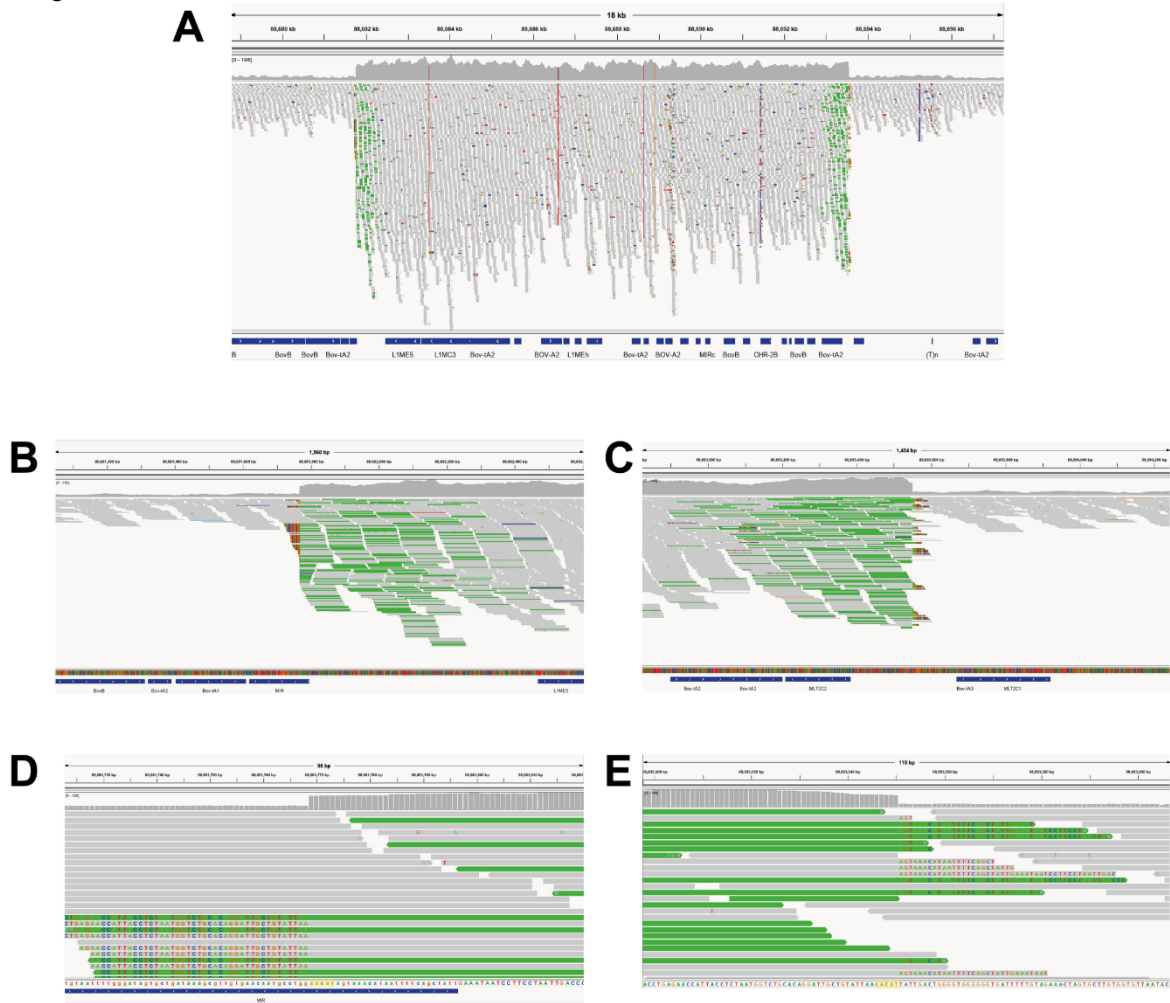

923  
924  
925

S3 Fig

**A**

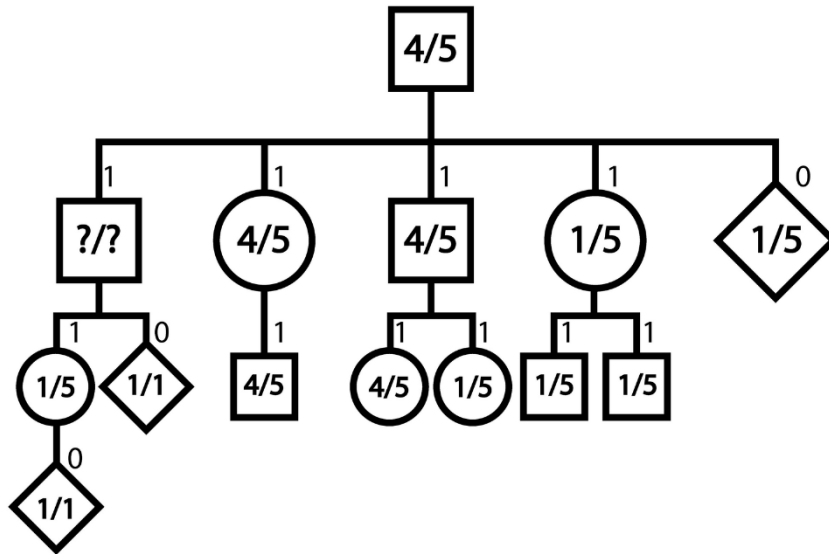

**B**

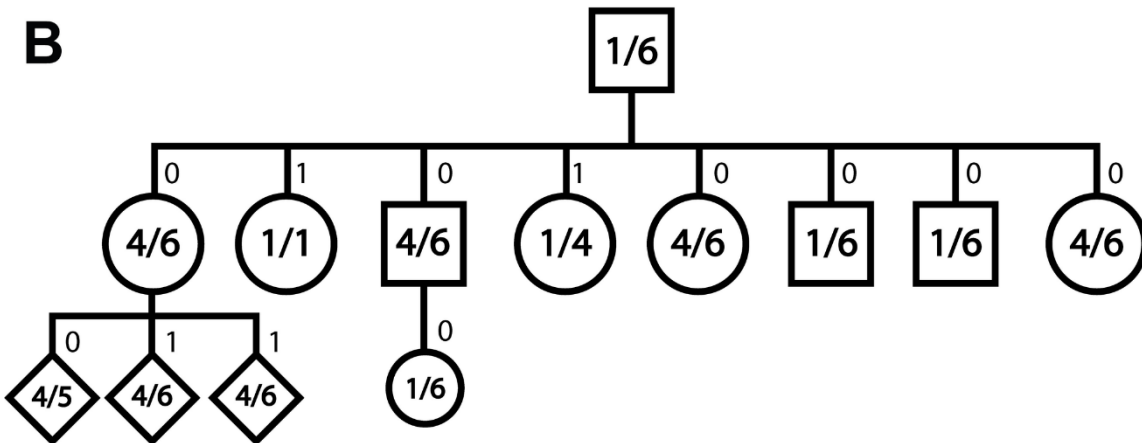

926  
927  
928

S4 Fig

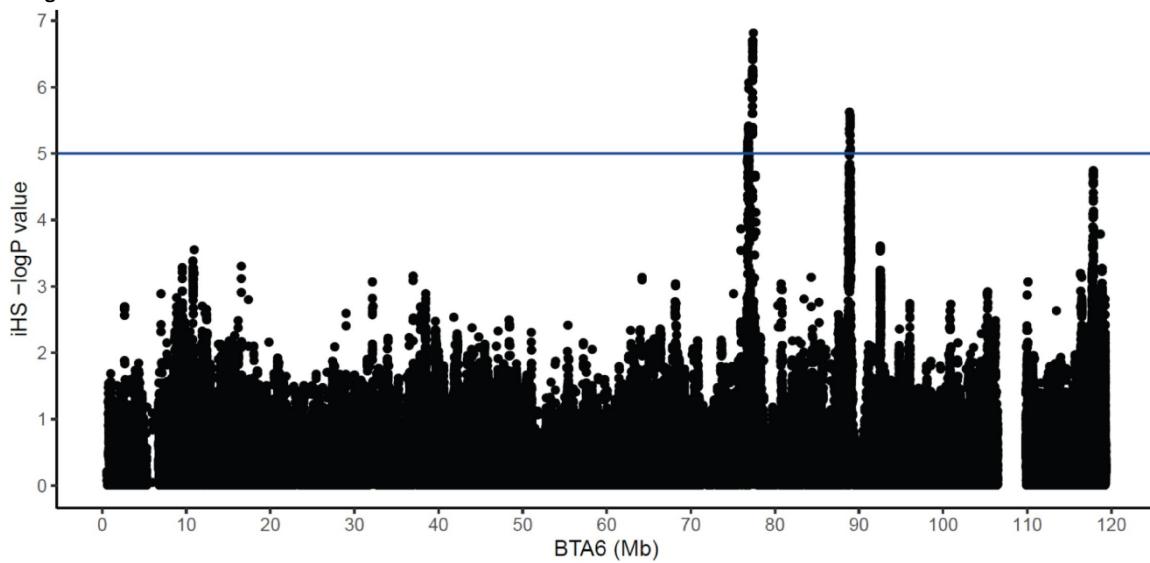

929  
930  
931

S5 Fig



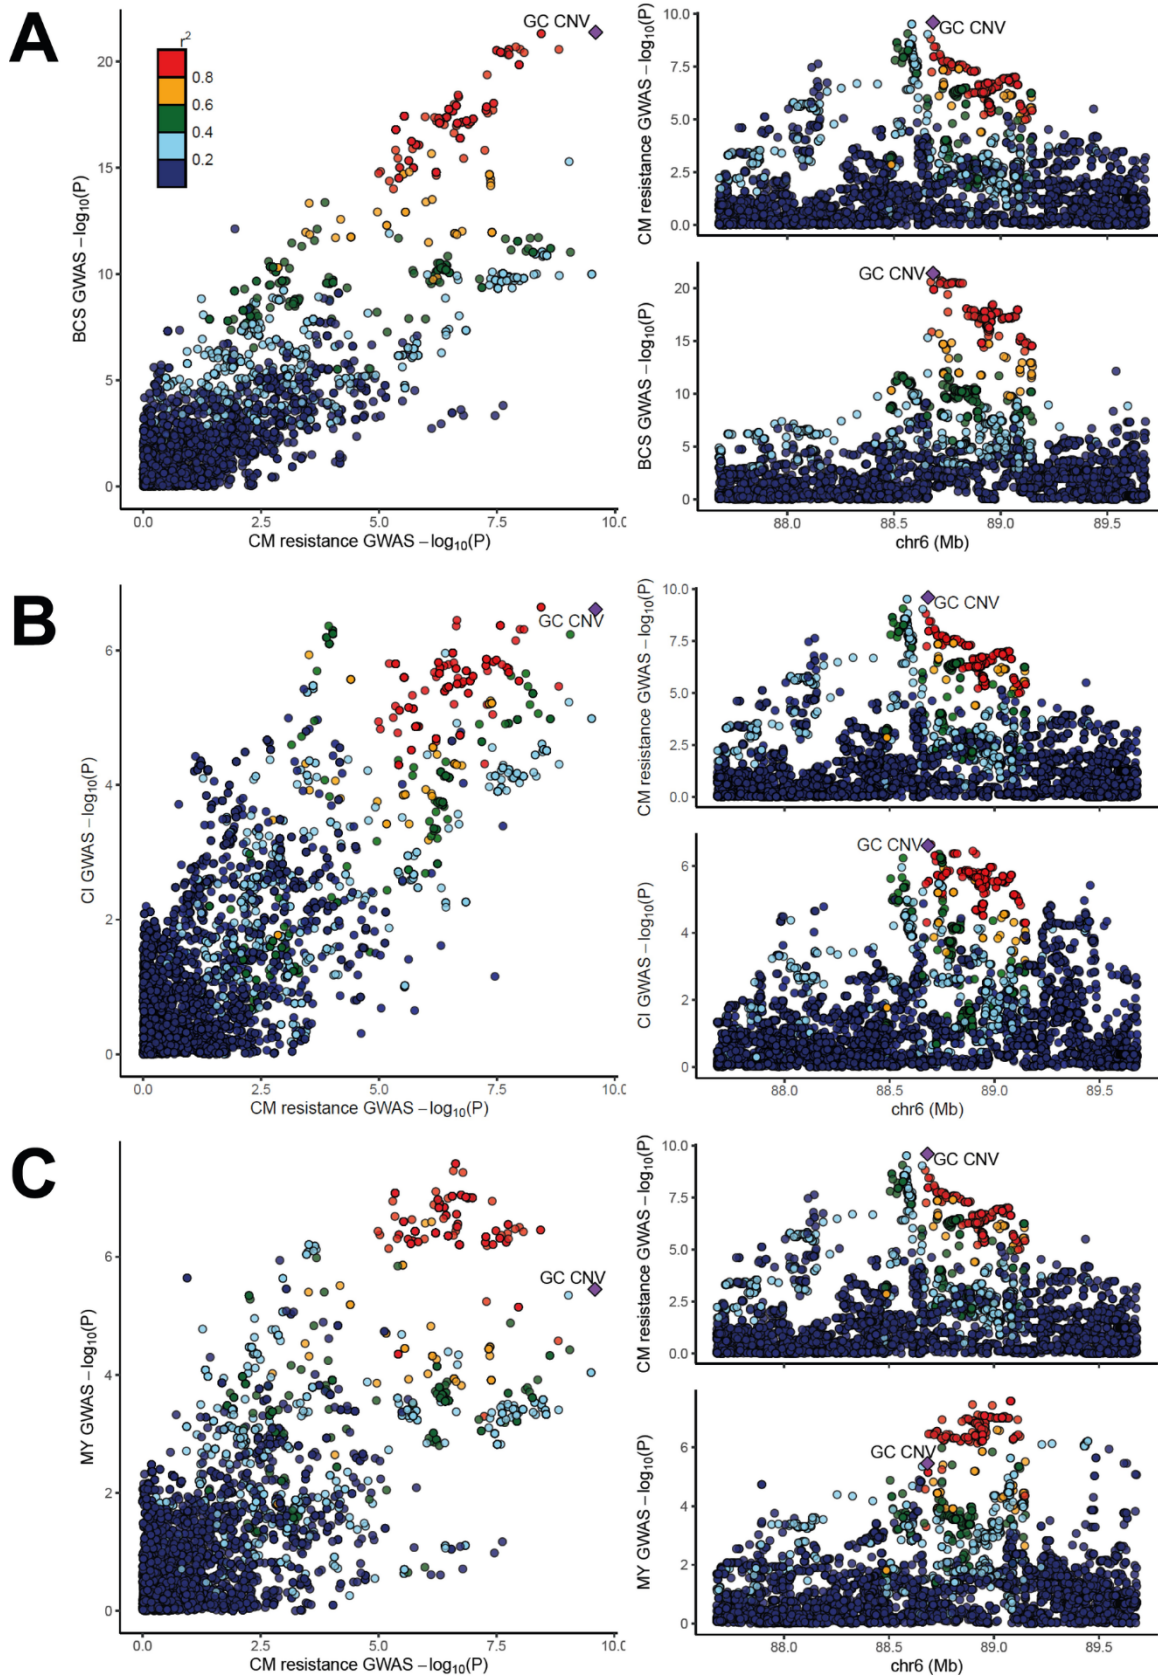

932  
933  
934

S6 Fig

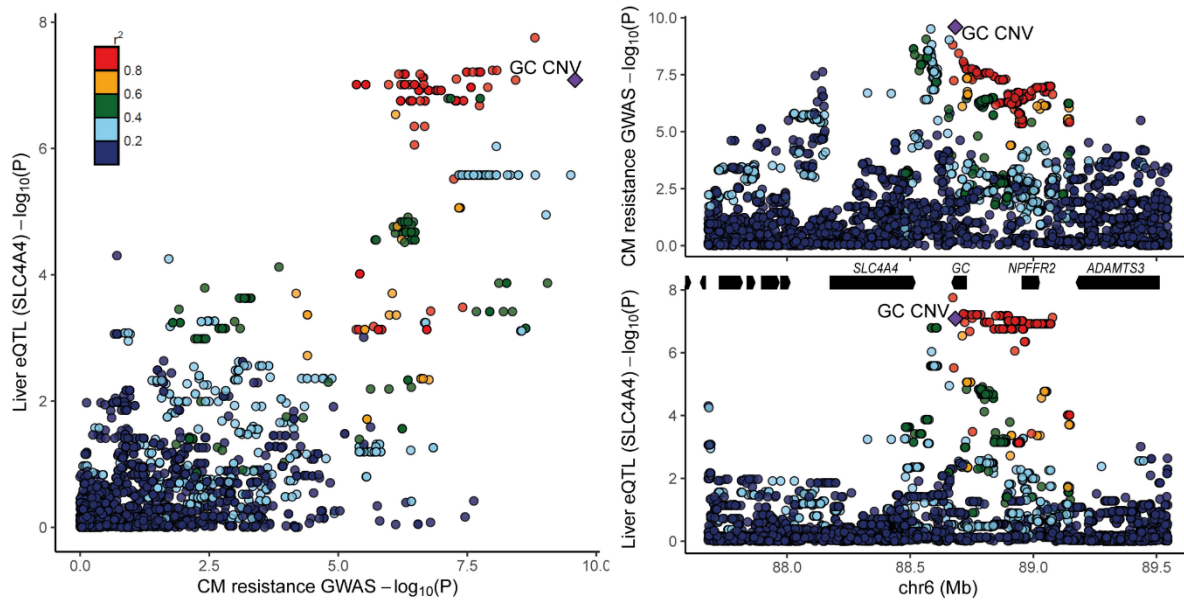

935  
936  
937  
938  
939  
940  
941  
942  
943  
944

**S1 Table** Homozygosity-by-descent results

**S2 Table** GC CNV allele effects for CM resistance, milk yield, body condition score, and calving interval

**S3 Table** GC expression across various tissue types in human transcriptome databases

**S4 Table** Custom genotyping array probe design and genotyping results

**S5 Table** Summary-based Mendelian Randomization analysis results

**S6 Table** List of traits routinely collected in a Dutch HF breeding organization

## 945 **Data reporting**

946 Genome sequence data of the CM resistance QTL region (BTA 6:84-93 Mb) of the 266 Dutch Holstein Friesian animals are deposited  
947 in the European Nucleotide Archive under accession **XXXX (under preparation)**. The RNA-seq data is deposited under EBI  
948 ArrayExpress accession E-MTAB-9348 and 9871. The genotype data used for eQTL mapping is deposited under **European Variant**  
949 **Archive XXXX (under preparation)**. The ATAC-seq data is deposited under EBI ArrayExpress accession E-MTAB-9872. Genotype and  
950 phenotype data used for genome-wise association studies were obtained from CRV B.V., a commercial cattle breeding company. As  
951 such, the data are available upon reasonable request and with permission of CRV B.V..

952

## 953 **Additional information requested at submission**

### 954 **Research Funding**

955 YLL, ACB, MB, MAMG, and RFV are financially supported by the Dutch Ministry of Economic Affairs (TKI Agri & Food project 16022)  
956 and the Breed4Food partners Cobb Europe, CRV, Hendrix Genetics and Topigs Norsvin. CC and TD are senior research associates  
957 from the Fonds de la Recherche Scientifique–FNRS (F.R.S.-FNRS). GCMM is post-doctoral fellow of the H2020 EU project BovReg  
958 (2019-2022). This work was supported by grants from the European Research Council (Damona; ERC AdG-GA323030 to MG), and the  
959 EU Framework 7 program (GplusE to MG and HT). YLL was supported by WIAS travel grant by Wageningen University and Research  
960 and Erasmus+ grant for research visit.

961 The funders had no role in study design or decision to publish.

962

### 963 **Competing interests**

964 EM is an employee of CRV B.V., one of the partners of the Breed4Food consortium. All other authors declare that they have no  
965 conflict of interest.

966
